# Supplementary material for: Liquefaction, landslide and slope stability analyses of soils: a case study of soils from part of Kwara, Kogi and Anambra states of Nigeria
Source: Copernicus journal article supplement (doi:10.5194/nhess-2016-297), 2016-10-26
Supplement: Supplementary file [file nhess-2016-297-RC2-supplement.pdf]

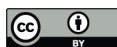

# **1 Liquefaction, landslide and slope stability analyses of soils: A case study of 2 soils from part of Kwara, Kogi and Anambra states of Nigeria**

3 Olusegun O. Ige<sup>1</sup>, Tolulope A. Oyeleke<sup>1</sup>, Christopher Baiyegunhi<sup>2</sup>, Temitope L. Oloniniyi<sup>2</sup>  
 4 and Luzuko Sigabi<sup>2</sup>

5 <sup>1</sup>Department of Geology and Mineral Sciences, University of Ilorin, Private Mail Bag 1515,  
 6 Ilorin, Kwara State, Nigeria

7 <sup>2</sup>Department of Geology, Faculty of Science and Agriculture, University of Fort Hare, Private  
 8 Bag X1314, Alice, 5700, Eastern Cape Province, South Africa

9 Corresponding Email Address: 201201530@ufh.ac.za

10

## **11 ABSTRACT**

12 Landslide is one of the most ravaging natural disaster in the world and recent occurrences in  
 13 Nigeria require urgent need for landslide risk assessment. A total of nine samples representing  
 14 three major landslide prone areas in Nigeria were studied, with a view of determining their  
 15 liquefaction and sliding potential. Geotechnical analysis was used to investigate the  
 16 liquefaction potential while the slope conditions were deduced using SLOPE/W. The results  
 17 of geotechnical analysis revealed that the soils contain 6-34 % clay and 72-90 % sand. Based  
 18 on the unified soil classification system, the soil samples were classified as well graded with  
 19 group symbols of SW, SM and CL. The plot of plasticity index against liquid limit shows that  
 20 the soil samples from Anambra and Kogi are potentially liquefiable. The liquefaction screening  
 21 criteria also revealed that Anambra and Kogi are potentially susceptible to liquefaction,  
 22 whereas samples from Kwara are not susceptible to liquefaction. Samples from Kogi and  
 23 Anambra have lower values of MDD and OMC, ranging between 1.64-1.80 g/cm<sup>3</sup> and 8.0-12.3  
 24 % respectively. These values showed that the samples are granular material with soil having  
 25 anticipated embankments performance, subgrade and base material as poor-fair, fair-good and  
 26 good-poor, respectively. The direct shear strength test on the soil samples indicated that the  
 27 cohesion and angle of internal friction varies between 40-80 kPa and 24-35°. The Coefficient  
 28 of permeability vary between  $8.71 \times 10^{-5}$  and  $1.18 \times 10^{-3}$ . The factor of safety (FOS) values for  
 29 soils from Anambra, Kogi and Kwara are 1.452, 1.946 and 2.488, respectively. These values  
 30 indicate stability but care must be taken as the condition at the site shows that the slope is in its  
 31 state of impending failure. The FOS for dry slope was higher when compared to the FOS values  
 32 from wet slope. This was due to the effect of pore water pressure on the soil as it reduced the



33 shear strength of the soil. A reduced value of FOS was observed in the model under loading  
34 conditions, which indicate that loading is also a contributing factor to the slope failure. It is  
35 recommended that proper and efficient drainage system should be employed in these areas to  
36 reduce the influence of pore water pressure in the soil.

37 *Keywords:* Liquefaction, landslide, slope stability, geotechnical analyses, Nigeria

38

## 39 1. INTRODUCTION

40 The effect of natural disaster in the world cannot be over-emphasized, as a number of failures  
41 of embankments, natural slopes, earth structures and foundations have been attributed to the  
42 liquefaction of sands, landslides and slope instability. According to the report documented by  
43 National Research Council (1985), case studies of landslides or flow failures due to  
44 liquefaction are the 1937 Zeeland coast of Holland slides involving 7 million cubic meters of  
45 alluvial sands, and the 1944 Mississippi River slide near Baton Rouge containing about 4  
46 million cubic meters of fine sands. Just to mention a few cases, failure of hydraulic fill dams  
47 such as the Calaveras Dam (California) in 1918, Fort Peck Dam (Montana) in 1938, and Lower  
48 San Fernando Dam (California) in 1971, were triggered by the liquefaction of sands. Landslides  
49 are a major hazard in Africa where resources worth several millions of dollars are lost annually  
50 during seasons of heavy and light rains. In West Africa, landslides are caused primarily by  
51 rainfall. Depending on meteorological and geomorphologic conditions, individual rainfall  
52 events can trigger small or large slope failures.

53 One of the most recent natural disasters threatening Nigeria is landslide. In Nigeria, landslide  
54 has done a serious destruction to physical structure and resulted in the loss of lives and  
55 properties. For instance, the December 2005 landslides in Umuchiani community of Anambra  
56 state has led to the inhabitation of about 250 families, while over 20 communities in Awgu and  
57 Oji-River Local Government Areas of Enugu State were thrown into serious difficulties by  
58 landslides cutting off a portion of the Awgu-Achi-Oji River Federal road in October  
59 2011. According to the report documented by State Emergency Management Agency (SEMA),  
60 the landslide that occurred in Oko Community of Anambra State has rendered more than 150  
61 people homeless. In addition, they reported that 15 buildings were destroyed, but no life was  
62 lost. In 2013, no fewer than nine persons were buried alive, while many others sustained  
63 injuries in the landslide that occurred at Edim Otop community of Calabar metropolis (Figure  
64 1). The landslide occurred after heavy rainfall which lasted for more than five hours. Landslides



induced by high-intensity or prolonged rainfalls constitute a major risk factor in Nigeria especially because they have generally been poorly defined in the past. The landslides have the potential to damage human settlements, industrial development, cattle ranch, forestry and agricultural activities. Landslide is mass movement on slope involving rock fall, debris flow, topples, and sliding (Varnes et al., 1984). Landslide occurs as result of the presence of saturated clay materials on the impermeable layer on steep slopes. Landslide that occurred on a slope is influenced by gravity. The internal and external causes of landslide is presented in  e 1. The presence of soil moisture also increases the pore water pressure and **lessens** the material stability. A change in pore water pressure is regarded as the main triggering factor to land sliding (Ngecu and Mathu, 1999 and Knapen et al., 2006). If an external load is applied to a soil mass on a slope in the form of additional water or overburden, the pore water pressure will build up such that mass and water will be expelled at weak points (Alexander, 1993).

Slope instability is the condition which gives rise to slope movements (Alexander, 1993). In every slope, there are forces (stresses) that tend to instigate or cause movement (shear stress), and opposing forces which tend to resist movement (shear strength), (Bromhead, 1984; Alexander, 1993). Sliding occurs when shear stress is greater than shear strength. In normal circumstances, the shear stress is balanced by shear strength and a state of equilibrium is maintained (Alexander, 1993). However, this equilibrium can be disturbed by stress increments or weakening of frictional force. The failure of slope material depends partly on the strength of frictional force between the sliding mass and the bedrock (Crozier, 1984; Alexander, 1993; and Matsushi et al., 2006). Slope stability analysis can be performed using either total or effective stress. Total stress analysis is applicable to embankments and multistage loading problems where the short term condition is critical, while effective stress analysis should be used for excavation problems where the long-term condition is critical (Duncan, 1996). The search for the preparatory factors and cause(s) of an individual landslide or an attempt to designate the state of instability is prompted to find an efficient way of responding to the problem by legal  sity, or simply by a desire for knowledge (Crozier, 1984). The danger of slope instability **can** never be over emphasized in its destructive property. To understand and evaluate liquefaction potential of soils and degree of slope stability, as well as causes of landslide in the area, three localities (Anambra, Kogi and Kwara state, Figure 3) that differ in geology and land use were studied. **While slope failure and landslides are common and frequent in the mountainous parts of Anambra and Kogi state because of their unique geology, long-time residents report that the recent landslides at Oko, in Anambra state (Figure 1) is the first major** 

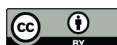

98 slope failures despite the much higher elevation and steepness of slopes in the area. These  
 99 differences in scale and frequency were the major motivating factors for the research.

## 100 2. GEOLOGICAL BACKGROUND

101 Nigeria is a part of Africa that forms the continental crust and lies in the Pan-African mobile  
 102 belt that has been affected by Pan- African events during the ages of orogenic, epeirogenetic,  
 103 tectonic and metamorphic cycles (Rahaman, 1976). The geology of Nigeria can be subdivided  
 104 into the Precambrian Basement Complex and Cretaceous to Tertiary sedimentary basins. The  
 105 Nigerian Basement Complex forms part of the Pan-African mobile belt and lies between the  
 106 West African and Congo Cratons (Figure 3) and to the south of Tuareg Shield (Black, 1980).  
 107 It consists of gneiss migmatite complex, schist belt and granitoids (older granites) of the  
 108 Archean, Paleoproterozoic and Neoproterozoic (Annor, 1998). The Nigerian basement  
 109 (Fig.2.1) was affected by the 600 Ma Pan-African orogeny and it occupies the reactivated  
 110 region which resulted from plate collision between the passive continental margin of the West  
 111 African craton and the active Phanerozoic continental margin (Burke and Dewey, 1972; Dada,  
 112 2006). About 50% of the total landmass of Nigeria is covered by sedimentary basins. These  
 113 basins are Bida Basin, Benue Trough, Chad Basin, Anambra Basin, Dahomey Basin and Niger  
 114 Delta Basin. The basins generally develop over the Precambrian basement and dominated by  
 115 clastic deposit and in places, ironstone and organic coal-bearing sediments (Nguimbous-  
 116 Kouoh, 2012). The study area falls in both the Basement Complex and sedimentary areas. The  
 117 areas under sedimentary part of Nigeria are Oko in Anambra State and Agbaja in Kogi State,  
 118 while those in the Basement Complex are Eyekorin and Asa Dam in Ilorin, Kwara State.

### 119 2.1 Location of the study area

#### 120 2.1.1 Oko, Anambra State

121 Oko is situated in Orumba North Local Government Area (LGA) of Anambra state. It is  
 122 geographically situated between 6°02'37.34" N and 7° 04'54.32" E and has humid climatic  
 123 condition. The average annual rainfall in Oko is about 2,000 mm. Most rainfall occurs in well-  
 124 defined rainy seasons of six to seven months (April to October) and is typically concentrated  
 125 in high intensity storms and often causes flooding and erosion leading to the formation of  
 126 gullies. Oko is a rain forest area and is characterized by vast undulating landscape and of  
 127 alluvial plain. Greater part of its vegetation is made up of forest (tropical vegetation).

128

129



### 130 2.1.2 Agbaja, Kogi State

131 Agbaja is the locality of a large iron ore deposit in Kogi State, central Nigeria. It is located on  
 132 a plateau about 300 km south of the capital Abuja, and more importantly about 70 km from the  
 133 heavy duty railway to the sea at Itakpe which is about 70 km to the south. It is geographically  
 134 situated between 7°56'53.33" N and 6°39'38.40" E. The land rises from about 300 m along the  
 135 Niger Benue confluence, to the heights about 500 m above sea level in the uplands. Agbaja  
 136 Plateau, which ranges from 335-366 m above sea level, is one of the predominant landforms in  
 137 the state. The state is drained by the Niger and Benue rivers and their tributaries.

### 138 2.1.3 Asa Dam and Eyenkorin, Kwara State

139 The sample localities are located in Ilorin metropolis which is a Basement Complex terrain that  
 140 has undergone deep weathering. The Nigeria Basement Complex is a group of igneous and  
 141 metamorphic rocks of Precambrian age (Kogbe, 1975). It is largely undifferentiated and  
 142 constitutes about 50 % of the bedrock in Nigeria. Large outcrops of granite and gneisses with  
 143 cross-cutting pegmatites are common (Alao, 1983). The general trend of the outcrops in the  
 144 area is SW-NE with a west dip.

## 145 3. MATERIALS AND METHODS

### 146 3.1 Site visit and Data collection

147 Oko area in Anambra State, Agbaja Hill in Lokoja, Kogi State as well as Asa Dam and  
 148 Eyenkorin (Ilorin metropolis) in Kwara State of Nigeria were visited for soil sampling and to  
 149 evaluate existing conditions of slopes situated in the site. The weathered surface was removed  
 150 and the outcrop was horizontally dug inward in order to obtain fresh samples. The effective  
 151 soil sampling depth was determined using a screw soil auger, a surveying tape, depths of recent  
 152 landslides and slope remodelling. However, in areas where landslides had occurred, the  
 153 samples were collected from the sides of scar. In special cases, selection of sample locations  
 154 were based on indications of slope instability, mainly soil creeping and cracking. Coordinates  
 155 of the sampling pits (sites) and photographs were taken during field visits to provide additional  
 156 records. The collected fresh soil samples were transported to the Mechanical Engineering  
 157 Department soil laboratory, University of Ilorin, Nigeria for geotechnical tests in order to  
 158 access the probable mechanical behaviour. The investigated shear strength parameters of the  
 159 soil samples were later used in slope stability evaluation.

160

161

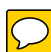

## 162 **3.2 Geotechnical analysis**

163 Preliminary geotechnical classification and identification tests such as moisture content, bulk  
 164 density, specific gravity, grain size distribution, hydraulic conductivity, particle density, bulk  
 165 density, liquid limit, plastic limit, and plasticity index, compaction and shear strength tests were  
 166 carried out on the soil samples based on the British Standard (BSI 1377:1990). Each  
 167 geotechnical test was performed twice on the same soil sample under the same condition in  
 168 order to determine the reliability of the geotechnical test results. The result of the Atterberg  
 169 consistency limits were plotted after Seed et al. (1983; 2003) in order to deduce whether the  
 170 soils are susceptible to liquefaction. The boundaries in the gradation curves for soils susceptible  
 171 to liquefaction, as proposed by Tsuchida (1970) were also used to determine whether the soils  
 172 are susceptible to liquefaction.

### 173 **3.2.1 Grain Size Analysis**

174 Mechanical and hydrometer methods were used to determine the grain size distributions. The  
 175 mechanical method (wet sieving) was employed in the analysis of particles that are greater than  
 176 0.075 mm in diameter. A calibrated (ASTM 152H) hydrometer was used to analyse the finer  
 177 grains ( $d < 0.075$  mm) in the laboratory.

#### 178 **3.2.1.1 Procedures for mechanical method (wet sieving)**

179 The soil particles were gently separated from each other. The sieve set (stack of sieves) were  
 180 arranged in descending order from the top with a retainer beneath it. 100 g of each soil sample  
 181 was weighed and poured into the sieve stack. The soil filled sieve stack was placed on the  
 182 mechanical sieve shaker for about 10 minutes. The sieve stack was later separated and the soil  
 183 fraction retained by the mesh of each sieve was retrieved. The soil fraction retained by each  
 184 sieve was weighed and the statistical data of the grain size analysis was computed.

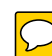

#### 185 **3.2.1.2 Procedures for hydrometer method**

186 The sieved clay and silt from the sieve washing was collected in a container and allowed to  
 187 settle. The supernatant water was decanted and the mud residue was dried in the drying oven  
 188 for about 24 hours. 500 g of the dried mud was soaked in distilled water for 24 hours and mixed  
 189 properly in a stirrer with a dispersive agent (hexametaphosphate) added to avoid flocculation  
 190 of the grains. The suspension was poured into 1 litre measuring cylinder and mixed before the  
 191 soil grains were allowed to settle in the suspension. The hydrometer was later inserted into the  
 192 water in the measuring cylinder and its reading was recorded periodically. As the settling  
 193 proceeds, the hydrometer sinks deeper into the solution. The temperature at each hydrometer



194 reading was recorded and then a statistical data sheet was produced showing the results of the  
195 analysis. The clay and silt percentage in the samples were then calculated from the graph  
196 obtained by plotting percentage passing against the grain diameters.

### 197 **3.2.2 Atterberg limits determination**

198 To determine the liquid limit of the soil samples, the fraction of the soil that passed through the  
199 425 $\mu$ m sieve was weighed (230 g) on a weighing balance and carefully mixed with clean water  
200 in order to form a thick homogeneous paste. A groove was cut through the paste (soil sample)  
201 that was placed inside the Casagrande's apparatus cup and the numbers of blows were counted  
202 and recorded until the groove in the soil closes. The moisture contents were determined and  
203 the moisture contents were plotted against the numbers of blows in order to determine the liquid  
204 limit. To determine the plastic limit, soil sample was also taken from the soil sample that passes  
205 through the 425 $\mu$ m sieve and weighed on the balance. Then it was thoroughly mixed with water  
206 using the hand until it becomes homogenous and plastic enough to form ellipsoidal-circular  
207 shape (i.e. ball). The ball-shaped soil was rolled in a rolling device until the thread cracks or  
208 crumbles at about 4 mm diameter. The crumbled sample (4 mm) was then air-dried thus the  
209 moisture contents were determined.

### 210 **3.2.3 Procedures for compaction test**

211 3 kg of soil sample was weighed and poured into the mixing pan. 120 cm<sup>3</sup> (4 %) of water was  
212 measured, added and mixed with the soil in the mixing pan using a hand trowel. The cylinder  
213 mould was placed on a base plate, then a representative specimen of the soil was put into the  
214 mould and compacted with 25 evenly distributed blows of the rammer. This represents the first  
215 layer. After the compaction, the volume of soil in the mould reduced, more soil specimen was  
216 added into the mould and compacted with another 25 evenly distributed blows. The extension  
217 collar was fixed unto the mould. This is mainly for the last layer and removed after the last  
218 layer was made and aided to achieve a smooth level surface. The mould was filled with more  
219 of the soil specimen and compacted to make the third layer. This is for standard Proctor, and  
220 five layers of the soil specimen with 55 evenly distributed blows of the rammer makes the  
221 modified Proctor. The mould with the soil was weighed and the soil was sampled at the top  
222 and bottom of the mould for water content and the dry density determination. The mould was  
223 emptied into the mixing pan and another 120 cm<sup>3</sup> (4%) of water was added to the soil and  
224 mixed. The same procedure was repeated for all the samples. The dry densities were plotted  
225 against water contents for the standard Proctor and modified Proctor in order to determine the





226 maximum dry densities (MDD) and optimum moisture contents (OMC) of the soil samples in  
 227 each situation.

### 228 3.2.4 Shear strength determination

229 Two 3 kg of both soil samples (standard and modified Proctor for each soil sample) were  
 230 weighed and mixed with the corresponding optimum moisture content. The soil samples were  
 231 then compacted as described in the above procedure. A square sampler was then gently used  
 232 to collect a representative sample. Each collected sample was placed in a shear box and a load  
 233 was placed on it both in horizontal and vertical positions and the deformation dial gauges were  
 234 set at zero. A set of normal loads of 5 kg, 10 kg, 15 kg and 20 kg were applied one after the  
 235 other in successive tests. The readings on the load dial units were recorded, and the procedure  
 236 was repeated for the standard Proctor and modified Proctor for other samples. The shear  
 237 strength results were presented as stress-strain curves and the shear stress was plotted against  
 238 the normal stress, thus the angle of cohesion and angle of internal friction were determined.

### 239 3.3 Method of slices using SLOPE/W software

240 The slope model was analysed using SLOPE/W and SEEP/W software with the aim of giving  
 241 the state of the slopes with their factor of safety using Limit Equilibrium Method (LEM). The  
 242 software computes the factor of safety (FOS) for various shear surfaces (SS), for example  
 243 circular and non-circular. However, only the circular SS was automatically searched. The  
 244 method of slices was considered in relation to its application to SLOPE/W and traditional  
 245 methods of analysis. According to Abramson et al. (2002) slices method is widely used by  
 246 much computer software because it can accommodate geometry of complex slope, different  
 247 soil conditions and influence of external boundary loads. Conventionally, the weight of soil  
 248 lying at a particular point should influence the stress acting normal to that point on sliding  
 249 surface. Theoretically, the basic principle of slices method is the potential slide mass, which is  
 250 subdivided into several vertical slices and the equilibrium of individual slice can be evaluated  
 251 in terms of forces and moments. This would allow easy estimation of the allowable safety factor  
 252 of a slide mass. In this study, two soil layers obtained from shear strength test, with different  
 253 strength parameters were used for slope stability analyses. This same shear strength parameters  
 254 were used in both dry and wet conditions. Similarly, two unit weight soils, one above the  
 255 groundwater table (GWT) and the other below the GWT were also considered. The complete  
 256 set of input parameters used in the study are shown in Table 9. The three different conditions  
 257 considered for slope stability analyses are dry slope, wet slope and dry slope with external  
 258 loads. The analysed load conditions were defined as:





- 259 • Case 1: Completely dry slope, i.e. no GWT **inside the model**.
- 260 • Case 2: Completely saturated slope, i.e. GWT on the surface (hydrostatic pore pressure),
- 261 • Case 3: Dry slope with external forces, i.e.  $q = 40$  and  $50$  kPa.

262 The stability of the dry slope was first analysed in SLOPE/W. The minimum factor of  
 263 safety (FOS), critical slip surfaces (CSS) were searched by entry and exit **option** as well as  
 264 groundwater table (GWT) level shown in the model using limit equilibrium (LM) principle.  
 265 The CSS was searched from thousands of possible SS by defining the input of 15  
 266 slices, 1500 iterations, 15 increments for entry, 10 increments for exit and 5 increments for  
 267 radius. In addition to the limit equilibrium methods (LEM), the Bishop's and Janbu's simplified  
 268 methods as well as the Spencer and Morgenstern-Price (M-P) factors of safety were used for  
 269 rotational and irregular surface failure mechanisms.

## 270 4. RESULTS AND DISCUSSION

### 271 4.1 Grain size distribution and soil classification

272 The results of grain size analysis is shown in Figure 4 and Table 2. The grain size distribution  
 273 curves show that the soil samples consist of all fractions ranging from **gravely to clayey**. The  
 274 clay content is found **between 2-34** % in all the soil samples. The soil sample from Asa Dam  
 275 road in Ilorin, which is plastic in nature has the highest clay content of about 34 %. Soil samples  
 276 from Lokoja and Anambra states have very low fine content ranging **from 2-12** % and are not  
 277 plastic in nature. The sand fraction dominated the samples (constituted about 70-80 % of the  
 278 samples) especially those **gotten** from Lokoja and Anambra states. Similarly, the grading  
 279 coefficient ( $C_u = D_{60}/D_{10}$ ) varies **from 5-275**, except for the sample from Asa Dam 1 with  $C_u$   
 280 of 2000. Based on the Unified Soil Classification System (ASTM D2487-90, 1992), **all the soil**  
 281 **samples are classified as well graded with group symbols SW, SM and CL** (Figures 4 and 5;  
 282 Table 2).

### 283 4.2 Atterberg limit

284 The summary of results obtained from moisture content, liquid limit, plastic limit and plasticity  
 285 index analyses are presented in Figure 6 and Table 3. The plasticity charts (Figure 7) was used  
 286 to classify the samples and most of the samples are above A-line (Figure 8). Eyenkorin 1, 2  
 287 and Asa Dam 1, 2 are in the region with symbol CL, thus they are classified as inorganic clays  
 288 of **medium compressibility**. Anambra 1, 2 and Lokoja 1, 2 and 3 falls in the CL-ML region and  
 289 thus they are classified as cohesionless and inorganic silts of **low compressibility**.

290



### 291 4.3 Compaction test

292 The compaction test at standard state condition yielded maximum dry densities (MDD) of  
 293  $1.84\text{g/cm}^3$  and  $1.88\text{g/cm}^3$  for Eyenkorin 1 and 2, respectively (Figure 9). The optimum moisture  
 294 content (OMC) for Eyenkorin (in Kwara state) 1 and 2 are 14.0 % and 13 %, respectively.  
 295 Samples from Lokoja (Kogi state) and Oko (Anambra state) have lower values of MDD and  
 296 OMC, ranging between  $1.64\text{--}1.80\text{ g/cm}^3$  and  $8.0\text{--}12.3\text{ %}$ , respectively. These values when  
 297 compared to Table 4 show that the samples can be described as granular material with soil  
 298 having anticipated embankments performance as poor to fair, value as subgrade material as fair  
 299 to good and value as a base course as good to poor (Table 5).

### 300 4.4 Shear strength and permeability

301 The summary of shear strength and permeability results, as well as their interpretations are  
 302 tabulated in Tables 6 and 7. The direct shear strength test on the soil samples show that the  
 303 cohesion and angle of internal friction varies between  $40\text{--}80\text{ kPa}$  and  $24\text{--}35^\circ$ . The Coefficient  
 304 of permeability of the soil samples vary between  $8.71 \times 10^{-5}$  and  $1.18 \times 10^{-3}$ .

### 305 4.5 Liquefaction susceptibility

306 The results of liquefaction studies after Seed et al. (1983; 2003) are depicted in Figures 10 and  
 307 11. Liquefaction involves the temporary loss of internal cohesion of material, such that it  
 308 behaves as a viscous fluid rather than as a soil (Alexander, 1993). Soils containing a high  
 309 percentage of sand and silt will deform more quickly than those containing high percentage of  
 310 clay. Due to their cohesive strength, clays adjust more slowly to increase pore-water pressure  
 311 than unconsolidated soils. The plot of plasticity index against Liquid limit after Seed et al.  
 312 (2003) shows that the soil samples from Anambra and Lokoja are potentially liquefiable. The  
 313 liquefaction screening criteria after Andrews and Martin (2000) also shows that Oko  
 314 (Anambra), Eyenkorin (Kwara) and Lokoja (Kogi) are potentially susceptible to liquefaction,  
 315 whereas samples from Asa Dam 1 - 2 (Kwara) are not susceptible to liquefaction (Figure 11).

316 Boundaries in the gradation curves for soils were used to determine liquefaction susceptibility  
 317 of the soil samples (Tsuchida, 1970). Boundary most susceptible to liquefaction is in the sand  
 318 region, with about 60-80 % of sand, whereas boundary for potentially liquefiable soil is in the  
 319 region of 20-40 % sand (Tsuchida, 1970). Soils with a higher percentage of gravels tend to  
 320 mobilize higher strength during shearing, and to dissipate excess pore pressures more rapidly  
 321 than sands. However, there are case histories indicating that liquefaction has occurred in loose  
 322 gravelly soils (Seed, 1968; Ishihara, 1985; Andrus et al., 1991) during severe ground shaking



or when the gravel layer is confined by an impervious layer. Based on Tsuchida (1970) classification, it can be deduced that soil samples from Anambra 1 and Lokoja 1-3 have % of sand ranging from 72-96 %, thus they are liquefiable in nature (Figure 12; Table 8). Anambra 2 has 63 % of sand which is potentially liquefiable, based on the classification proposed by Tsuchida (1970). Some of the soil samples fall outside Tsuchida's boundaries and Walker and Steward (1989) documented that non-plastic and low plasticity silts, despite having their grain size distribution curves outside of Tsuchida's boundaries for soils susceptible to liquefaction, have a potential for liquefaction similar to that of sands. In addition, they further stated that increased plasticity will reduce the level of pore pressure response in silts. This reduction, however, is not significant enough to resist liquefaction for soils with plasticity indices of  $\leq 5$ .

#### 4.6 Landslide and slope stability

Slope angles, slope length play important roles in the stability of slopes. The slope angle is regarded as the major topographic factor in determining stability. The physical characteristics of the terrain influencing slope instability were measured. The characteristics recorded included slope length, angles, and altitude. The slope angles can be classified as steep angle as they are close to 60-70° in the study areas. Though the embankment slopes in Asa Dam area and Eyenkorin area have values in the range of 30-35° and are classified as moderate angles.

The factor of safety (FOS) gotten from SLOPE/W software were used to classify the slopes into safe, state of impending failure and failed slopes. Several authors have proposed different values for slope classification. The general and acceptable value for stable slope is 1.5, whereas a value less than 1 is always classified as unsafe. The analysed samples have values ranging from 1.366 - 2.488 (Figure 13-19; Table 10). The value of 1.366 is from the Oko area in Anambra state where landslide occurred. The maximum value of 2.488 was obtained at Asa Dam, which is an embankment slope and it depicts stable slope. The FOS for dry slope was higher when compared to the FOS values from wet slope (Figure 13). This was due to the effect of pore water pressure on the soil as it reduced the shear strength of the soil. Figure 14 shows the critical slip surface (CSS) and factor of safety (FOS) for non-optimal wet slope. The slip surface was at the top of the slope (Figure 13a) whereas in Figure 13b, it shows the CSS passing through ground water table (GWT), thus making the slip surface size bigger and occupies all of the entry point. Since suction effect has not been considered in the analysis, the located GWT has serious effect on the FOS. Figure 14 shows an increased in the geometry, and the CSS and FOS was affected drastically. The reduction in FOS from 2.51 to 1.45 (Figure 13) is an indication of the effect of pore water pressure and gravity on the failed site. Limit



356 equilibrium methods computed the values of FOS slightly lower than 1.5 which depict  
 357 instability. The pore pressure at the toe causes reduction in the effective normal stresses, and  
 358 hence the shear strength.

359 Two of the primary assumptions of Bishop's simplified method ignores interslice shear forces  
 360 and satisfies only moment equilibrium. However, not considering shear forces in the General  
 361 Limit Equilibrium (GLE) terminology mean that  $\lambda$  is zero. As a result, the Bishop's  
 362 Simplified factor of safety falls on the moment curve in Figure 17 where  $\lambda$  is zero.  
 363 Janbu's Simplified method also ignores interslice shear forces and only satisfies force  
 364 equilibrium. The Janbu's Simplified factor of safety consequently falls on the force curve in  
 365 Figure 17 where  $\lambda$  is zero. The Spencer and Morgenstern-Price (M-P) factors of safety are  
 366 determined at the point where the two curves cross. At this point the factor of safety satisfies  
 367 both moment and force equilibrium. Whether the crossover point is the Spencer or M-P factor  
 368 of safety depends on the interslice force function. Spencer only considered a constant  $X/E$  ratio  
 369 for all slices, which in the GLE formulation corresponds to a constant (horizontal) interslice  
 370 force function.

371

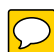

## 372 5. CONCLUSION

373 Liquefaction was suspected as the main cause of the landslide that occurred in Oko area of  
 374 Anambra State. The results from gradation curve which gave over 80% sand for the samples  
 375 from Lokoja and Anambra suggested that liquefaction is possible in the area if necessary  
 376 vibration is generated either from blasting or trucks/vehicular movement. In addition, from the  
 377 satellite image, the terrain is rugged in nature and the slope is steep which can facilitate  
 378 landslide by gravity. The results from the Atterberg limits show mixed values and therefore  
 379 making it difficult to use the values in the liquefaction interpretation. The liquefaction effects  
 380 on the soils has been proven to be one of the strong factors in the failure of these sites especially  
 381 the site at Oko area in Anambra State. With necessary vibration, liquefaction in those sites  
 382 could be a serious issues because of the composition of the grains (70-90%) sand and low  
 383 plasticity. The FOS values for Anambra 1-2, Lokoja 1-3, Eyenkorin 1-2 and Asa Dam 1-2 are  
 384 1.452, 1.946, 2.196 and 2.488, respectively. These values indicate stability but care must be  
 385 taken as the condition at the site shows that the slope is in its state of impending failure.  
 386 Optimisation effects was also tried and the results shown that loads on these slope might  
 387 contribute to the failure of the slopes.

388

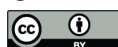

### 389 **AUTHOR CONTRIBUTION**

390 Dr Omoniyi Ige supervised the field work and writing of the manuscript. Tolulope Oyeleke  
 391 and Temitope Oloniniyi carried out the fieldwork. Christopher Baiyegunhi carried out data  
 392 processing and writing of the manuscript, while Luzuko Sigabi was involved in data processing  
 393 and correction of manuscript.

### 394 **ACKNOWLEDGEMENT**

395 The authors wish to thank Mr Ojuola Raymond of Rafworld Geological Services Limited,  
 396 Abuja, Nigeria for accommodation and assistance during fieldwork.

### 397 **CONFLICT OF INTERESTS**

398 The authors declared that there are no conflicts of interest concerning the publication of this  
 399 research work.

400

### 401 **REFERENCES**

- 402 Alao, D.A., 1983. Geology and Engineering properties of laterites from Ilorin, Nigeria”  
 403 Engineering Geology Vol. 20, pp. 111 - 118.
- 404 Abramson, L. W., Lee, T. S., Sharma, S. and Boyce, G. M., 2002. Slope stability and  
 405 stabilization methods, 2nd ed., John Wiley and Sons, Inc., New York, 712 p.
- 406 Alexander, D. (1993). Natural Disaster, London, University College Library Press.
- 407 Ako T. A., Abba F. M., Onoduku S., Nuhu W. M., Alabi A. A. and Mamodu A., 2014. The October  
 408 13, 2010 Landslides on the Azenge Mountain in Imande Ukusu, Nkomon Disrict, Benue  
 409 State, Nigeria Environment and Ecology Research Vol. 2, (3), 113-121.
- 410 American Association of State Highway and Transportation Officials (AASHTO). AASHTO  
 411 M145-91, 2003. Standard Specifications for Classification of Soils and Soil-Aggregate  
 412 Mixtures for Highway Construction Purposes.
- 413 American Society for Testing Materials, ASTM, 1992. Standard test method for classification  
 414 of soils for engineering purposes (Unified Soil Classification System).
- 415 ASTM standard D2487-90, 1992. Annual Books of ASTM Standards, Vol. 04.08, sec. 4.  
 416 American Society for Testing and Materials (ASTM), Philadelphia, Penn. pp. 326–336.
- 417 American Society for Testing Materials, ASTM, 1557, 1991. Test Method for Laboratory  
 418 Compaction Characteristics of Soil Using Modified Effort. ASTM D 1557-91 Standard  
 419 Test Method for Laboratory Compaction Characteristics of Soil Using Modified Effort.  
 420 Annual Book of ASTM Standards.



- 421 Andrus, R. D., Stokoe, K. H., and Roesset, J. M., 1991. Liquefaction of Gravelly Soil at Pence  
 422 Ranch during the 1983 Borah Peak, Idaho Earthquake. First International Conference on  
 423 Soil Dynamics and Earthquake Engineering V, Karlsruhe, Germany.
- 424 Andrews, D. C. A. and Martin, G. R., 2000. Criteria for liquefaction of silty soils, Proceedings  
 425 of the 12th World Conference on Earthquake Engineering, New Zealand, Paper No.  
 426 0312.
- 427 Annor, A.E., 1998. Structural and chronology relationship between low grade Igarra schist  
 428 terrain in the Precambrian exposure of Southwestern Nigeria” Journal of mining and  
 429 geology. Vol. 32, No. 2, pp. 187-194.
- 430 Ashiru M. A., Jacob E. S. and Sule M., 2014. Slope Stability Analysis Using Computer Software  
 431 for Black Cotton Soil of North - Eastern Nigeria. J. of Sciences and Multidisciplinary Research,  
 432 6 (2) 60 – 77.
- 433 Black, R., 1980. Precambrian of West Africa. Episodes 4:3–8.
- 434 British Standard Institution, 1990. Methods of Test for Soils for Civil Engineering Properties  
 435 (BS 1377)” British Standard Institution: London, UK. 143p.
- 436 Bromhead, E.N., 1987. Slopes and embankment. In P. Attewell and R. Taylor (eds).  
 437 Ground movements and their effects on structures, Glass glow, Survey University Press,  
 438 Blackie Group.
- 439 Burke, K. C. and Dewey, J. F., 1972. Orogeny in Africa. In: Dessauvague TFI, Whiteman AJ  
 440 (eds), Africa geology. University of Ibadan Press, Ibadan, 583–608.
- 441 Casagrande, A., and Fadum, R.E., 1936. Notes on Soil Testing for Engineering Purposes, Soil  
 442 Mechanics Series, Graduate School of Engineering, Harvard University, Cambridge.  
 443 M.A., 8, 567.
- 444 Crozier M. J., 1984. Field Assessment of Slope Instability in D Brunsten and D Prior (eds).  
 445 Slope Instability, New York, John Wiley and Sons.
- 446 Dada, S. S., 2006. Proterozoic evolution of Nigeria. In: Oshi O (ed) The basement complex of  
 447 Nigeria and its mineral resources (A Tribute to Prof. M. A. O. Rahaman). Akin Jinad &  
 448 Co. Ibadan, 29–44.
- 449 Duncan, J. M., 1996. State of the Art: Limit Equilibrium and Finite Element Analysis in  
 450 Slopes. Journal of Geotechnical Engineering, Vol. 122 No. 7, 577-96.



- 451 Ishihara, K., 1985. Stability of natural deposits during earthquakes. Proceedings of the Eleventh  
 452 International Conference on Soil Mechanics and Foundation Engineering, San Francisco.
- 453 Knapen, J. K, Poesen M, Brengelmans, J; Deckers W. J. and Muwanga, A. (2006). Landslides  
 454 in Densely Populated County at the Foot Slopes of Mount Elgon (Uganda):  
 455 Characteristics and Causal Factors, *Geomorphology* 73, 149–165.
- 456 Kogbe C.A., 1975. The cretaceous and Precambrian basement sediments of southwestern  
 457 Nigeria in Kogbe C.A (ed). *Geology of Nigeria*, 2nd revised edition
- 458 Matsushi, Y. Hattanji, T. and Matsukura, Y., 2006. Mechanics of Shallow Landslides on Soil  
 459 Mantled Slopes with Permeable and Impermeable Bedrock in Boso Peninsula, Japan,  
 460 *Geomorphology* 76, 92 -108.
- 461 McCall, G.J.H., Laming, D.J.C. and Scott, S.C., 1992. *Geohazards. Natural and Man-Made*.  
 462 Chapman and Hall, London.
- 463 National Research Council, 1985. Liquefaction of soils during earthquakes. Committee on  
 464 Earthquake Engineering, National Research Council, National Academy Press,  
 465 Washington, D.C.
- 466 Nguimbous-Kouoh, J.J., Takougang, E.M.T. Nouayou, R., Tabod, C.T. and Manguelle-  
 467 Dicoum, E., 2012. Structural Interpretation of the Mamfe Sedimentary Basin of  
 468 Southwestern Cameroon along the Manyu River Using Audiomagnetotellurics Survey.  
 469 *ISRN Geophysics*. pp. 1–7. <http://dx.doi.org/10.5402/2012/41304>.
- 470 Ngecu, M. and Mathu, E.M., 1999. The El-Nino Triggered Landslides and Their Socio-  
 471 Economic Impact on Kenya. *Environmental Geology* 38, 277 - 284.
- 472 Obaje N.G., 2009. *Geology and Mineral Resources of Nigeria*. Springer-Verlag Berlin  
 473 Heidelberg, 219p.
- 474 Okogbue, C.O., 1992. The 1988 Nanka landslide, Anambra State, Nigeria, *Bull. Int. Assoc.*  
 475 *Eng. Geol.* 46: 79 - 87.
- 476 Rahaman M.A., 1976. Review of the Basement Geology of South-Western Nigeria,” In: Kogbe  
 477 CA (ed) *Geology of Nigeria*, 2nd ed., Elizabethan Publishers, Lagos, pp. 41–58.
- 478 Seed, H. B., 1968. Landslides during earthquakes. *Journal of the soil mechanics and*  
 479 *foundations division, ASCE*, Vol. 94, No. SM5.
- 480 Seed, H. B., Idriss, I. M., and Arango, I., 1983. Evaluation of Liquefaction Potential Using  
 481 Field Performance Data," *Journal of the Geotechnical Engineering Division, ASCE*, Vol.  
 482 109, No. GT3.



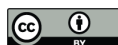

- 483 Seed, R. B., Cetin, K. O., Moss, R. E. S., Kammerer, A. M., Wu, J., Pestana, J. M., Riemer,  
 484 M.F., Sancio, R. B., Bray, J. D., Kayen, R. E., Faris, A., 2003. Recent Advances in Soil  
 485 Liquefaction Engineering: A Unified and consistent framework, 26th Annual ASCE  
 486 Keynote Presentation, 71.
- 487 Tsuchida H., 1970. Prediction and countermeasure against the liquefaction in sand deposits.  
 488 Seminar Abstract In: Port Harbour Research Institute, 3.1–3.33.
- 489 Varnes, D.J., 1984. Slope Movement and Types and Process; In Schuster, R.L. and Krizek,  
 490 R.J. (eds), Landslides: Analysis and Control, Transportation Research Board Special  
 491 Report 176, National Academy of Sciences, Washington D.C.
- 492 Walker, A.J., and Steward, H.E., 1989. Cyclic undrained behaviour of nonplastic and low  
 493 plasticity silts," Technical Report NCEER-89-0035, National Center for Earthquake  
 494 Engineering Research, SUNY at Buffalo.

495  
 496  
 497  
 498  
 499  
 500  
 501  
 502  
 503  
 504  
 505  
 506  
 507  
 508  
 509  
 510



511

512 Table 1: Causes of landslides (After McCall, 1992).

| External Causes                                                                                                              | Internal Causes                                                                                                                                                                                                         |
|------------------------------------------------------------------------------------------------------------------------------|-------------------------------------------------------------------------------------------------------------------------------------------------------------------------------------------------------------------------|
| 1. Geometrical change <ul style="list-style-type: none"> <li>• Height</li> <li>• Gradient</li> <li>• Slope length</li> </ul> | 1. Progressive Failure (internal response to unloading) <ul style="list-style-type: none"> <li>• Expansion and swelling</li> <li>• Fissuring</li> <li>• Straining, softening</li> <li>• Stress concentration</li> </ul> |
| 2. Loading <ul style="list-style-type: none"> <li>• Natural</li> <li>• Man-induced</li> </ul>                                | 2. Weathering <ul style="list-style-type: none"> <li>• Physical property changes</li> <li>• Chemical changes</li> </ul>                                                                                                 |
| 3. Unloading <ul style="list-style-type: none"> <li>• Natural</li> <li>• Man-induced</li> </ul>                              | 3. Seepage erosion <ul style="list-style-type: none"> <li>• Removal of cements</li> <li>• Removal of fine particles</li> </ul>                                                                                          |
| 4. Vibrations <ul style="list-style-type: none"> <li>• Single</li> <li>• Multiple/Continuous</li> </ul>                      | 4. Water regime change <ul style="list-style-type: none"> <li>• Saturation</li> <li>• Rise in water table</li> <li>• Excess pressures</li> <li>• Draw down</li> </ul>                                                   |

513

514

515 Table 2: Summary of the grain size analysis and soil classification.

| Sample ID   | S.G  | %<br>clay | %<br>silt | %<br>fine | %<br>sand | %<br>gravel | Cu   | Cc     | Group<br>symbol |
|-------------|------|-----------|-----------|-----------|-----------|-------------|------|--------|-----------------|
| Lokoja 1    | 2.53 | 2         | 2         | 4         | 96        | 0           | 5    | 1.19   | SW              |
| Lokoja 2    | 2.78 | 8         | 10        | 18        | 80        | 2           | 12   | 0.0005 | SM              |
| Lokoja 3    | 2.56 | 12        | 8         | 20        | 72        | 2           | 389  | 81     | SM              |
| Anambra 1   | 2.58 | 6         | 5         | 11        | 83        | 6           | 86   | 38     | SM              |
| Anambra 2   | 2.47 | 12        | 18        | 30        | 63        | 7           | 267  | 6      | SM              |
| Eyenkorin 1 | 2.67 | 18        | 35        | 55        | 31        | 16          | 220  | 7      | CL              |
| Eyenkorin 2 | 2.68 | 22        | 39        | 61        | 31        | 8           | 33   | 0.42   | CL              |
| Asa Dam 1   | 2.65 | 32        | 18        | 50        | 30        | 20          | 2000 | 0.035  | CL              |
| Asa Dam 2   | 2.65 | 34        | 26        | 60        | 36        | 4           | 275  | 0.074  | CL              |

516 Key: SW and SM = Poorly Graded Sand, CL= Well Graded Sandy silt.

517



518 Table 3: Plasticity values of the soil samples.

| Sample ID   | Depth (m) | Moisture content (%) | Liquid limit (%) | Plastic limit (%) | Plasticity index (%) |
|-------------|-----------|----------------------|------------------|-------------------|----------------------|
| Lokoja 1    | 8.6       | 1.6                  | 23.0             | 15.0              | 8.0                  |
| Lokoja 2    | 12.5      | 0.8                  | 28.0             | 24.0              | 4.0                  |
| Lokoja 3    | 17.0      | 9.8                  | 27.0             | 18.0              | 9.0                  |
| Anambra 1   | 10.2      | 0.8                  | 21.0             | 16.5              | 4.5                  |
| Anambra 2   | 12.0      | 0.8                  | 23.0             | 19.45             | 3.55                 |
| Eyenkorin 1 | 2.3       | 1.3                  | 41.0             | 21.3              | 19.7                 |
| Eyenkorin 2 | 3.0       | 1.8                  | 44.5             | 15.5              | 29.0                 |
| Asa Dam 1   | 2.5       | 2.5                  | 40.0             | 17.5              | 22.5                 |
| Asa Dam 2   | 3.4       | 3.3                  | 43.0             | 22.5              | 19.5                 |

519

520 Table 4: Compaction characteristics and ratings of unified soil classification classes for soil  
 521 construction (ASTM, 1557-91).

| Visual Description          | Maximum Dry-Weight Range (g/cm <sup>3</sup> ) | Optimum Moisture Range (%) | Anticipated Embankment Performance | Value as Subgrade material | Value as Base Course |
|-----------------------------|-----------------------------------------------|----------------------------|------------------------------------|----------------------------|----------------------|
| Granular material           | 2.00-2.27                                     | 7-15                       | Good to excellent                  | Excellent                  | Good                 |
| Granular material with soil | 1.76-2.16                                     | 9-18                       | Fair to excellent                  | Good                       | Fair to poor         |
| Fine sand and sand          | 1.76-1.84                                     | 9-15                       | Fair to good                       | Good to fair               | Poor                 |
| Sandy silts and silts       | 1.52-2.08                                     | 10-20                      | Poor to good                       | Fair to poor               | Not suitable         |
| Elastic silts and clays     | 1.36-1.60                                     | 20-35                      | unsatisfactory                     | Poor                       | Not suitable         |
| Silty-clay                  | 1.52-1.92                                     | 10-30                      | Poor to good                       | Fair to poor               | Not suitable         |
| Elastic silty clay          | 1.36-1.60                                     | 20-35                      | unsatisfactory                     | Poor to very poor          | Not suitable         |
| Clay                        | 90-115                                        | 15-30                      | Poor to fair                       | Very poor                  | Not suitable         |



Table 5: Compaction characteristics and ratings of the soil samples based on the unified soil classification classes for soil construction (ASTM, 1557-91).

| Sample ID   | MDD<br>(g/cm <sup>3</sup> ) | OMC<br>(%) | Anticipated<br>Embankment<br>Performance | Value as<br>Subgrade material | Value as Base<br>Course |
|-------------|-----------------------------|------------|------------------------------------------|-------------------------------|-------------------------|
| Lokoja 1    | 1.73                        | 8.5        | Poor                                     | Fair                          | Good                    |
| Lokoja 2    | 1.80                        | 8.0        | Fair                                     | Good                          | Poor                    |
| Lokoja 3    | 1.76                        | 12.3       | Fair                                     | Good                          | Poor                    |
| Anambra 1   | 1.76                        | 10.1       | Fair                                     | Good                          | Poor                    |
| Anambra 2   | 1.64                        | 8.8        | Poor                                     | Good                          | Fair                    |
| Eyenkorin 1 | 1.84                        | 14.0       | Fair                                     | Good                          | Fair                    |
| Eyenkorin 2 | 1.88                        | 13.0       | Fair                                     | Good                          | Fair                    |
| Asa Dam 1   | 1.85                        | 13.4       | Fair                                     | Good                          | Fair                    |
| Asa Dam 2   | 1.87                        | 12.2       | Fair                                     | Good                          | Fair                    |

Table 6: The summary of the shear strength parameters and interpretation.

| Sample ID   | Cohesion, c<br>(kPa) | Angle of internal<br>friction, $\phi$ | Interpretation              |
|-------------|----------------------|---------------------------------------|-----------------------------|
| Lokoja 1    | 48                   | 28.5 <sup>0</sup>                     | Loose sand: rounded grains  |
| Lokoja 2    | 70                   | 29 <sup>0</sup>                       | Loose sand: rounded grains  |
| Lokoja 3    | 65                   | 24 <sup>0</sup>                       | Loose sand: rounded grains  |
| Anambra 1   | 50                   | 29 <sup>0</sup>                       | Loose sand: rounded grains  |
| Anambra 2   | 55                   | 28 <sup>0</sup>                       | Loose sand: rounded grains  |
| Eyenkorin 1 | 60                   | 23 <sup>0</sup>                       | Loose sand: rounded grains  |
| Eyenkorin 2 | 80                   | 26 <sup>0</sup>                       | Loose sand: rounded grains  |
| Asa Dam 1   | 40                   | 35 <sup>0</sup>                       | Medium sand: rounded grains |
| Asa Dam 2   | 60                   | 32 <sup>0</sup>                       | Medium sand: rounded grains |



Table 7: Coefficient of permeability for the samples and their interpretations.

| Sample ID   | $K$ (mm/sec)          | $K$ (cm/sec)          | Interpretation                 | Drainage condition |
|-------------|-----------------------|-----------------------|--------------------------------|--------------------|
| Lokoja 1    | $1.18 \times 10^{-3}$ | $1.18 \times 10^{-4}$ | Clean sand and gravel mixtures | Good               |
| Lokoja 2    | $9.77 \times 10^{-4}$ | $9.77 \times 10^{-5}$ | Very fine sand                 | Poor               |
| Lokoja 3    | $3.61 \times 10^{-4}$ | $3.61 \times 10^{-5}$ | Very fine sand                 | Poor               |
| Anambra 1   | $8.71 \times 10^{-4}$ | $8.71 \times 10^{-5}$ | Very fine sand                 | Poor               |
| Anambra 2   | $7.80 \times 10^{-4}$ | $7.80 \times 10^{-5}$ | Very fine sand                 | Poor               |
| Eyenkorin 1 | $1.18 \times 10^{-3}$ | $1.18 \times 10^{-3}$ | Clean sand and gravel mixtures | Good               |
| Eyenkorin 2 | $1.18 \times 10^{-3}$ | $1.18 \times 10^{-3}$ | Clean sand and gravel mixtures | Good               |
| Asa Dam 1   | $1.18 \times 10^{-3}$ | $1.18 \times 10^{-3}$ | Clean sand and gravel mixtures | Good               |
| Asa Dam 2   | $1.18 \times 10^{-3}$ | $1.18 \times 10^{-3}$ | Clean sand and gravel mixtures | Good               |

Table 8: Grain size distribution summary showing the % of the grain fractions.

| Sample ID   | Specific gravity | % clay | % silt | % fines | % sand | % gravel | Classification after Tsuchiba (1970) |
|-------------|------------------|--------|--------|---------|--------|----------|--------------------------------------|
| Lokoja 1    | 2.53             | 2      | 2      | 4       | 96     | 0        | Liquefiable                          |
| Lokoja 2    | 2.78             | 8      | 10     | 18      | 80     | 2        | Liquefiable                          |
| Lokoja 3    | 2.56             | 12     | 8      | 20      | 72     | 2        | Liquefiable                          |
| Anambra 1   | 2.58             | 6      | 5      | 11      | 83     | 6        | Liquefiable                          |
| Anambra 2   | 2.47             | 12     | 18     | 30      | 63     | 7        | Potentially liquefiable              |
| Eyenkorin 1 | 2.67             | 18     | 35     | 55      | 31     | 16       | Potentially liquefiable              |
| Eyenkorin 2 | 2.68             | 22     | 39     | 61      | 31     | 8        | Potentially liquefiable              |
| Asa Dam 1   | 2.65             | 32     | 18     | 50      | 30     | 20       | Potentially liquefiable              |
| Asa Dam 2   | 2.65             | 34     | 26     | 60      | 36     | 4        | Potentially liquefiable              |



Table 9: Input parameters used in SLOPE/W analyses.

| Location                  | Soil layer | C (kPa) | Phi (°) | $\gamma$ (kN/m <sup>3</sup> ) |
|---------------------------|------------|---------|---------|-------------------------------|
| Oko1 (Anambra state)      | Upper      | 50      | 29      | 16.30                         |
| Oko 2 (Anambra state)     | Lower      | 55      | 28      | 15.70                         |
| Lokoja 1 (Kogi state)     | Upper      | 48      | 28.5    | 16.40                         |
| Lokoja 2 (Kogi state)     | Middle     | 70      | 29      | 17.10                         |
| Lokoja 3 (Kogi state)     | Lower      | 65      | 24      | 15.50                         |
| Eyenkorin 1 (Kwara state) | Upper      | 70      | 26      | 14.21                         |
| Eyenkorin 2 (Kwara state) | Lower      | 90      | 27      | 14.70                         |
| Asa Dam 1 (Kwara state)   | Upper      | 40      | 35      | 14.70                         |
| Asa Dam 2 (Kwara state)   | Lower      | 60      | 32      | 15.48                         |

Table 10: Summary of the factor of safety (FOS) for the soil samples.

|                   | O.D   |   | B.M   |   | J.M |       | M.P   |       | FOS   |
|-------------------|-------|---|-------|---|-----|-------|-------|-------|-------|
|                   | M     | F | M     | F | M   | F     | M     | F     | M     |
| Anambra 1 and 2   | 1.366 |   | 1.396 | - | -   | 1.434 | 1.452 | 1.462 | 1.452 |
| Lokoja 1 and 2    | 1.885 |   | 1.951 | - | -   | 1.883 | 1.946 | 1.950 | 1.946 |
| Eyenkorin 1 and 2 | 2.430 |   | 2.489 | - | -   | 2.462 | 2.488 | 2.485 | 2.196 |
| Asa Dam 1 and 2   | 2.118 |   | 2.200 | - | -   | 2.112 | 2.196 | 2.201 | 2.488 |

M = Moment, F= Force, O.D = Ordinary method, B.M = Bishop method, J.M = Janbu method, M.P = Morgeststein price.



562 Table 11: Summary of the reviewed literatures on slope stability and landslide.

| Authors                     | Locality                                                                                           | Methodology                                              | Research Interest                                                                                | Findings                                                                                                                                                                                                                                                                                             |
|-----------------------------|----------------------------------------------------------------------------------------------------|----------------------------------------------------------|--------------------------------------------------------------------------------------------------|------------------------------------------------------------------------------------------------------------------------------------------------------------------------------------------------------------------------------------------------------------------------------------------------------|
| Okogbue, 1992               | Nanka, Anambra State                                                                               | Geotechnical studies                                     | Causes of 1988 Nanka landslide                                                                   | Over consolidation of very highly plastic mudstone layer                                                                                                                                                                                                                                             |
| Ashiru <i>et al.</i> , 2014 | Nasarawa Northeastern Nigeria                                                                      | 3 LEMs: Stability chart, SLOPE/W and traditional methods | Stability of slopes on Black Cotton Soils                                                        | Dry- stable<br>Wet- unstable                                                                                                                                                                                                                                                                         |
| Ako <i>et al.</i> , 2014    | Nkomon District Benue State                                                                        | Interview, Field observation and Laboratory studies      | Causes of Nov. 13 <sup>th</sup> , 2010 landslide in Azenge Mountain in Imande Ukusu, Benue State | Highly fractured gneisses, granite and basaltic rocks and 2 grains type. Also, other causes are geological, morphological and human factors contributed                                                                                                                                              |
| Ogbonnaya, 2015             | Southeastern Nigeria                                                                               | Geotechnical studies                                     | Differentiation between landslides from sedimentary and metamorphic terrain                      | Sedimentary terrain- shallow volume movement, material slumps and short run out Metamorphic terrain- complex translational and rotational landslide                                                                                                                                                  |
| This study                  | Oko in Anambra state, Lokoja in Kogi state, and Asa dam and Eyenkorin both in Kwara state, Nigeria | Field observation, geotechnical studies and SLOPE/W      | Evaluating liquefaction potential, causes of landslide and degree of slope stability             | Soil samples from Anambra and Kogi are potentially liquefiable, whereas those from Kwara are not susceptible to liquefaction. The factor of safety (FOS) values shows that the slope is in its state of impending failure. Liquefaction is inferred as the main cause of the landslide in the areas. |





563

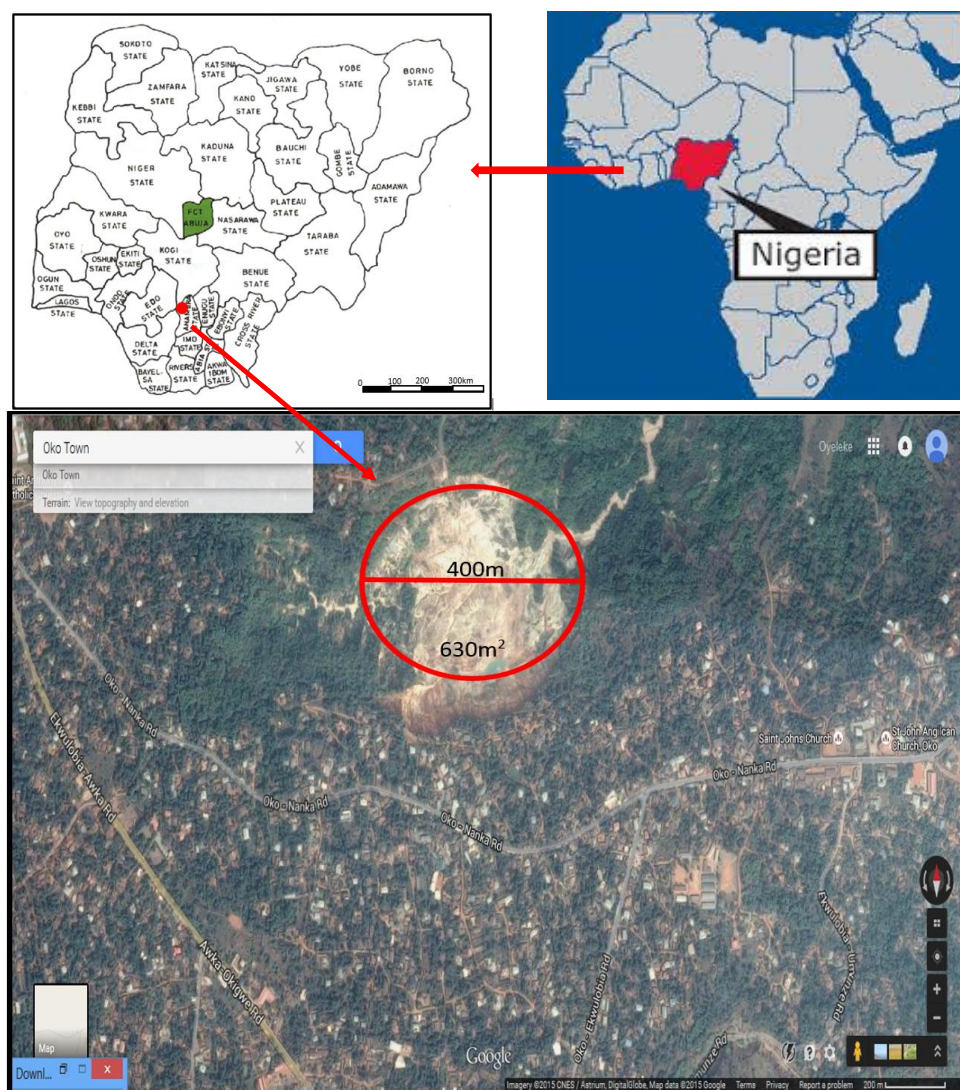

564

565 Figure 1: Satellite image of Oko area in Anambra State showing the landslide region (Red  
 566 circle: Landslide affected area).

567

568

569

570



571

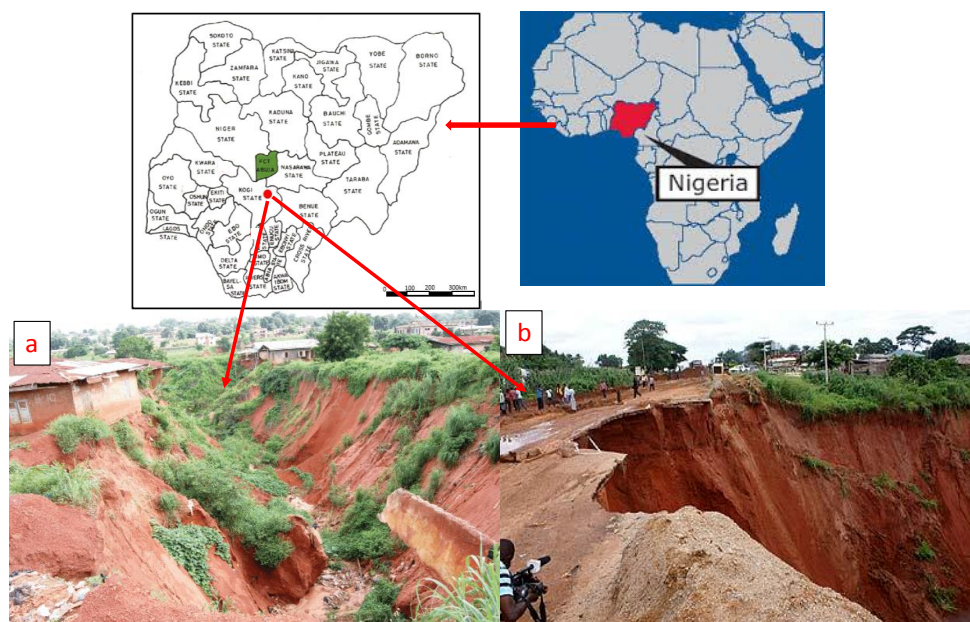

572

573 Figure 2: Structural failure in Lokoja (Kogi State) due to slope failure.

574

575

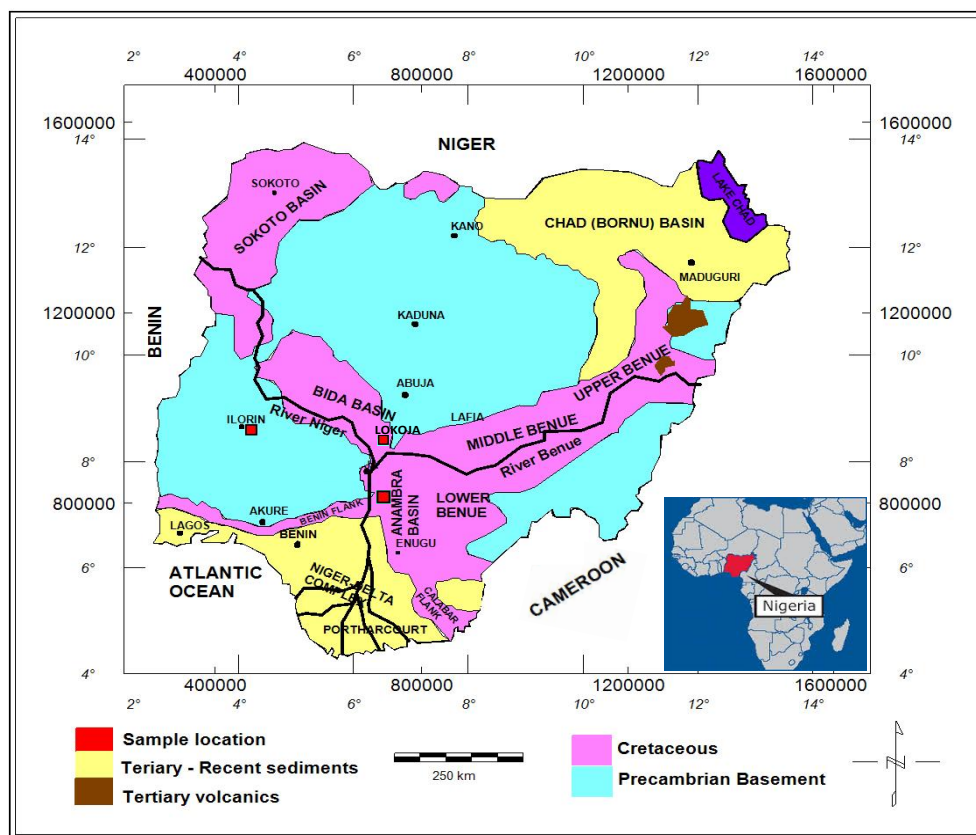

Figure 3: Geological map of Nigeria showing the major geological components and sampling location (After Obaje, 2009).

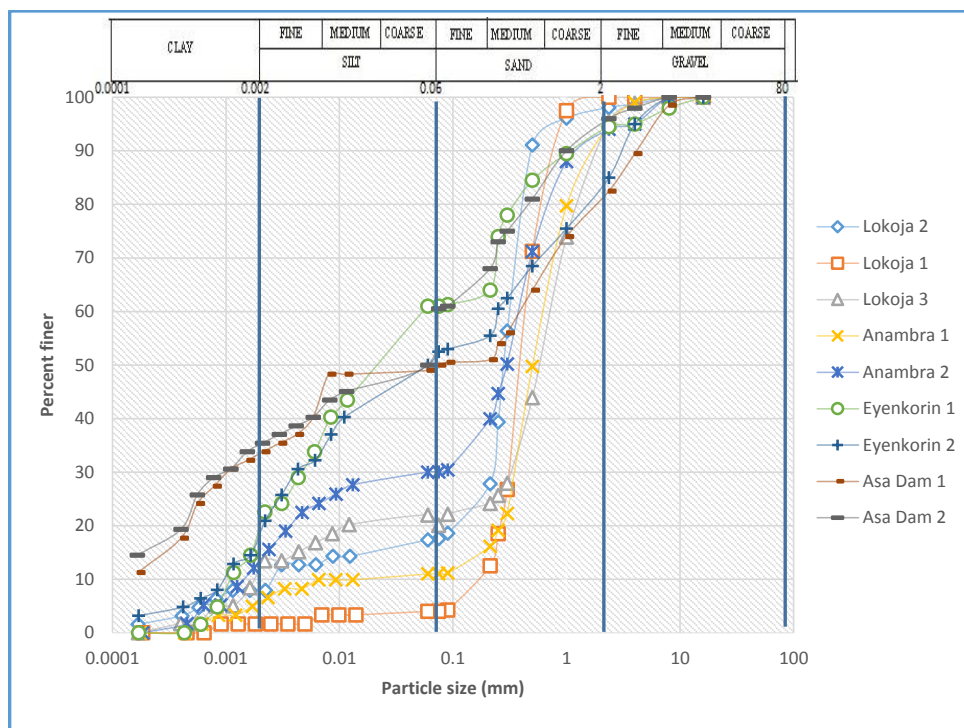

Figure 4: Grain size distribution curves for the soil samples.





| Major division    |                                         | Group symbol | Criteria                                                                                                      |
|-------------------|-----------------------------------------|--------------|---------------------------------------------------------------------------------------------------------------|
| $F_{200} < 50$    | Gravels<br>$\frac{R_4}{R_{200}} > 0.5$  | GW           | $F_{200} < 5$ ; $C_u \geq 4$ ; $1 \leq C_z \leq 3$                                                            |
|                   |                                         | GP           | $F_{200} < 5$ ; Not meeting the GW criteria of $C_u$ and $C_z$                                                |
|                   |                                         | GM           | $F_{200} > 12$ ; $PI < 4$ or plots <i>below A-line</i> (Fig. 4.2)                                             |
|                   |                                         | GC           | $F_{200} > 12$ ; $PI > 7$ and plots <i>on or above A-line</i> (Fig. 4.2)                                      |
|                   |                                         | GM-GC        | $F_{200} > 12$ ; $PI$ plots in the hatched area (Fig. 4.2)                                                    |
|                   |                                         | GW-GM        | $5 \leq F_{200} \leq 12$ ; satisfies $C_u$ and $C_z$ criteria of GW and meets the $PI$ criteria for GM        |
|                   |                                         | GW-GC        | $5 \leq F_{200} \leq 12$ ; satisfies $C_u$ and $C_z$ criteria of GW and meets the $PI$ criteria for GC        |
|                   |                                         | GP-GM        | $5 \leq F_{200} \leq 12$ ; does not satisfy $C_u$ and $C_z$ criteria of GW and meets the $PI$ criteria for GM |
|                   |                                         | GP-GC        | $5 \leq F_{200} \leq 12$ ; does not satisfy $C_u$ and $C_z$ criteria of GW and meets the $PI$ criteria for GC |
|                   | Sands<br>$\frac{R_4}{R_{200}} \leq 0.5$ | SW           | $F_{200} < 5$ ; $C_u \geq 6$ ; $1 \leq C_z \leq 3$                                                            |
|                   |                                         | SP           | $F_{200} < 5$ ; Not meeting the SW criteria of $C_u$ and $C_z$                                                |
|                   |                                         | SM           | $F_{200} > 12$ ; $PI < 4$ or plots <i>below A-line</i> (Fig. 4.2)                                             |
|                   |                                         | SC           | $F_{200} > 12$ ; $PI > 7$ and plots <i>on or above A-line</i> (Fig. 4.2)                                      |
|                   |                                         | SM-SC        | $F_{200} > 12$ ; $PI$ plots in the hatched area (Fig. 4.2)                                                    |
|                   |                                         | SW-SM        | $5 \leq F_{200} \leq 12$ ; satisfies $C_u$ and $C_z$ criteria of SW and meets the $PI$ criteria for SM        |
|                   |                                         | SW-SC        | $5 \leq F_{200} \leq 12$ ; satisfies $C_u$ and $C_z$ criteria of SW and meets the $PI$ criteria for SC        |
|                   |                                         | SP-SM        | $5 \leq F_{200} \leq 12$ ; does not satisfy $C_u$ and $C_z$ criteria of SW and meets the $PI$ criteria for SM |
|                   |                                         | SP-SC        | $5 \leq F_{200} \leq 12$ ; does not satisfy $C_u$ and $C_z$ criteria of SW and meets the $PI$ criteria for SC |
| $F_{200} \geq 50$ | Silts and Clays<br>$LL < 50$            | ML           | $PI < 4$ or plots <i>below A-line</i> (Fig. 4.2)                                                              |
|                   |                                         | CL           | $PI > 7$ and plots <i>on or above A-line</i> (Fig. 4.2)                                                       |
|                   |                                         | CL-ML        | $PI$ plots in the hatched area (Fig. 4.2)                                                                     |
|                   |                                         | OL           | $\frac{LL_{(oven\ dried)}}{LL_{(not\ dried)}} < 0.75$ ; $PI$ plots in the OL area in Fig. 4.2                 |
|                   | Silts and Clays<br>$LL \geq 50$         | MH           | $PI$ plots <i>below A-line</i> (Fig. 4.2)                                                                     |
|                   |                                         | CH           | $PI$ plots <i>on or above A-line</i> (Fig. 4.2)                                                               |
|                   |                                         | OH           | $\frac{LL_{(oven\ dried)}}{LL_{(not\ dried)}} < 0.75$ ; $PI$ plots in the OH area in Fig. 4.2                 |
|                   |                                         |              |                                                                                                               |
|                   | Highly organic matter                   | Pt           | Peat                                                                                                          |
|                   |                                         |              |                                                                                                               |

Note:  $C_u$  = uniformity coefficient =  $\frac{D_{60}}{D_{10}}$ ;  $C_z$  = coefficient of gradation =  $\frac{D_{30}^2}{D_{60} \times D_{10}}$

$LL$  = liquid limit on minus 40 sieve fraction

$PI$  = plasticity index on minus 40 sieve fraction

Figure 5: Unified Classification System (Based on materials passing 75mm sieve) (Based on ASTM-2487).

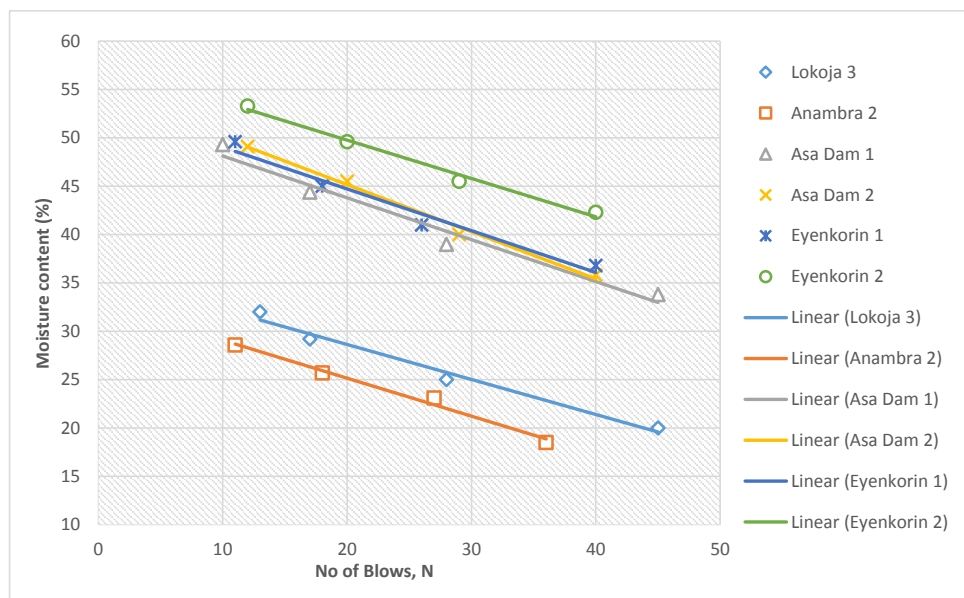

Figure 6: Plot of Moisture Content against No of blows, N for the soil samples.

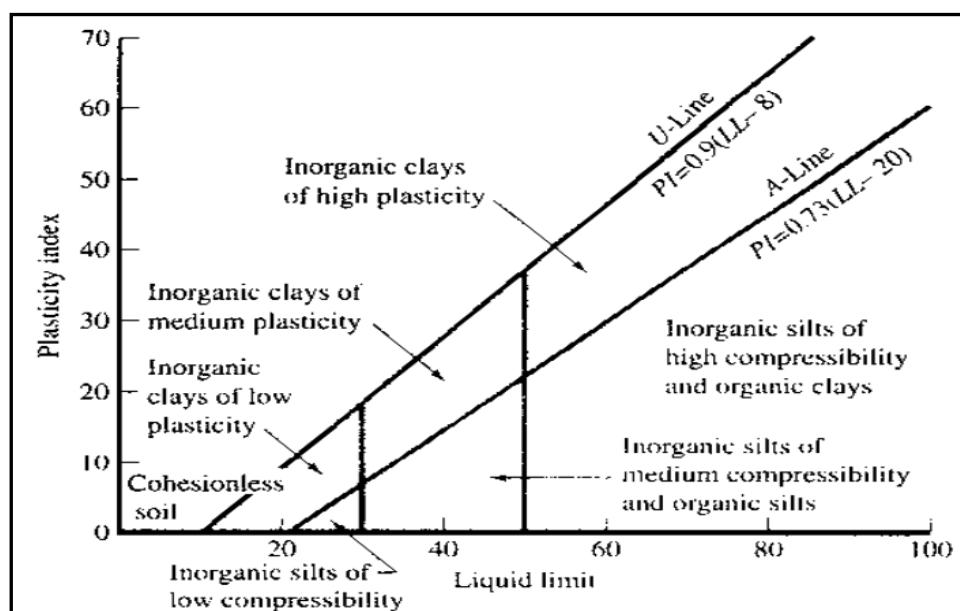

Figure 7: Standard plot of plasticity index against liquid limit (AASHTO SOIL classification system).

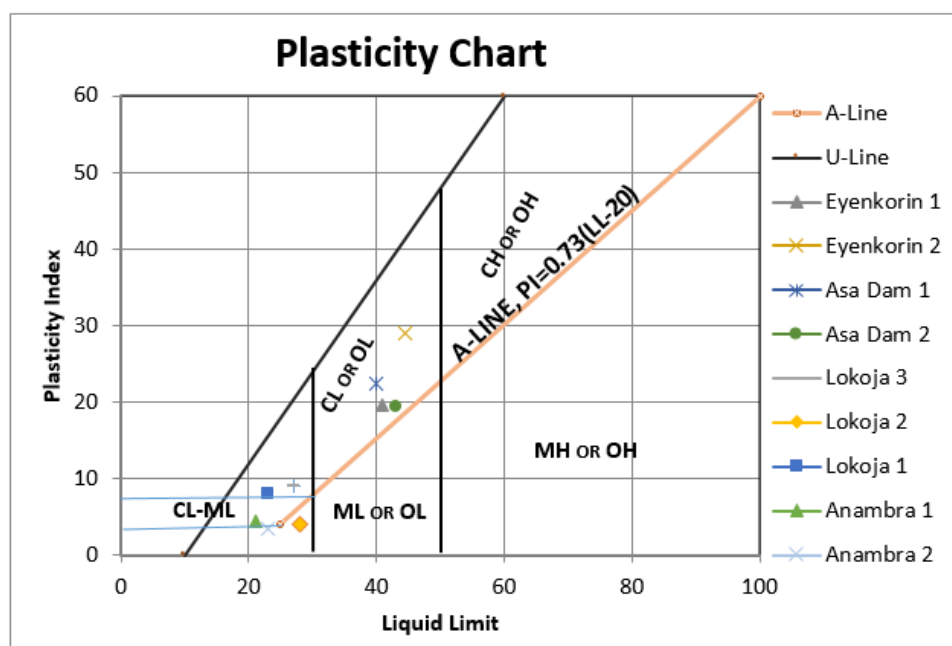

Figure 8: Plasticity chart plot for fine grained soil and fine fraction in coarse grained soil.





617

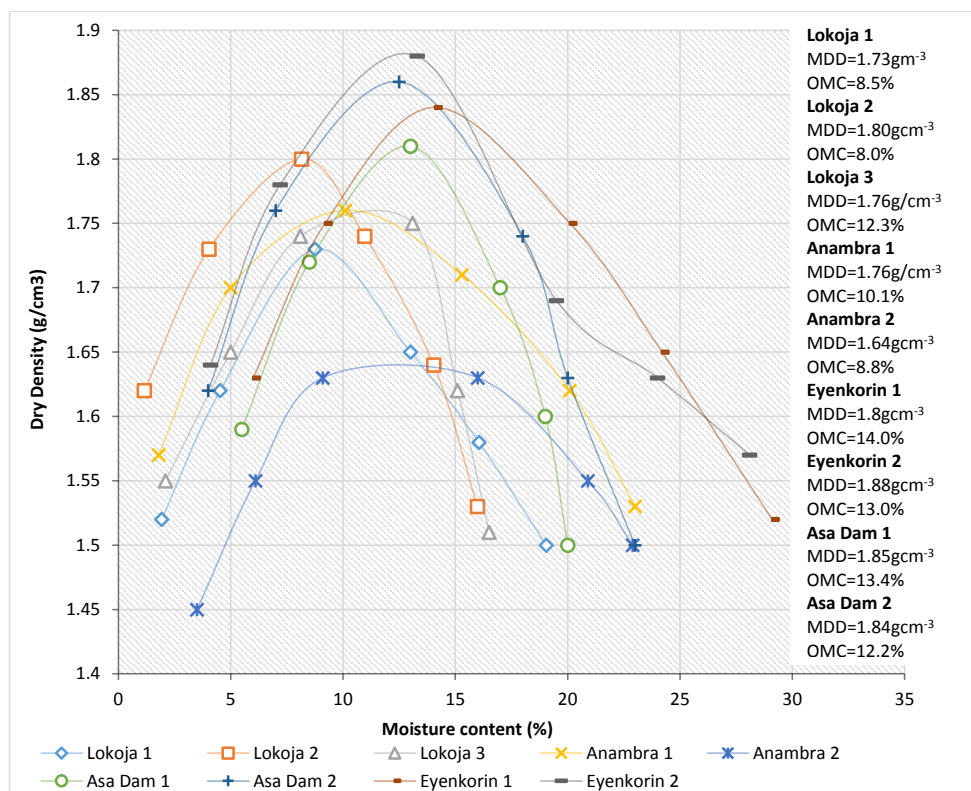

618

619 Figure 9: Compaction curves showing MDD and OMC of the soil samples.

620

621

622

623

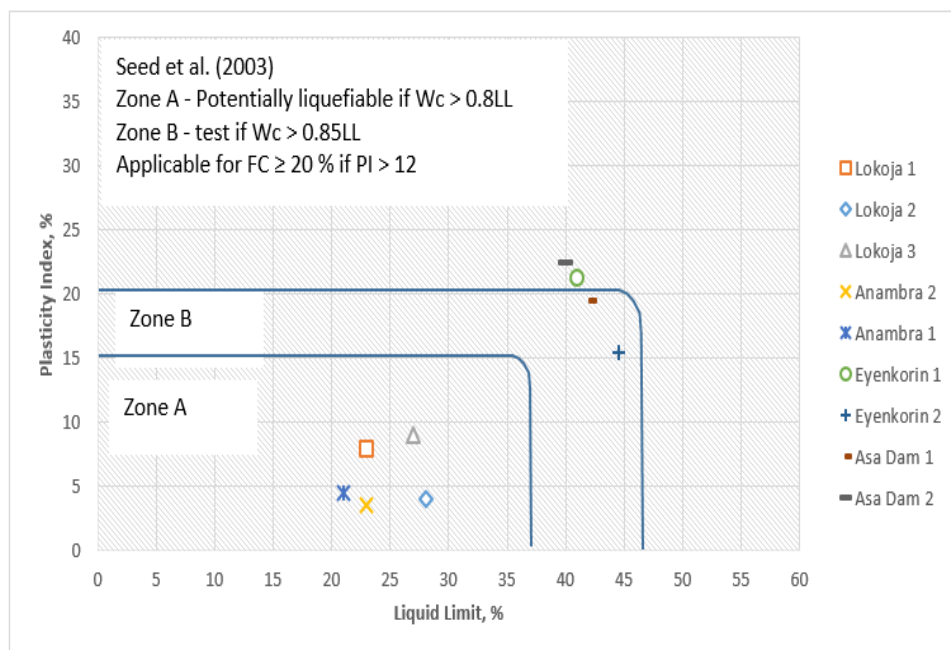

Figure 10: Plasticity chart showing the recommendations by Seed et al. (2003) regarding the assessment of "liquefiable" soil types and the Atterberg Limits of fine-grained soils.

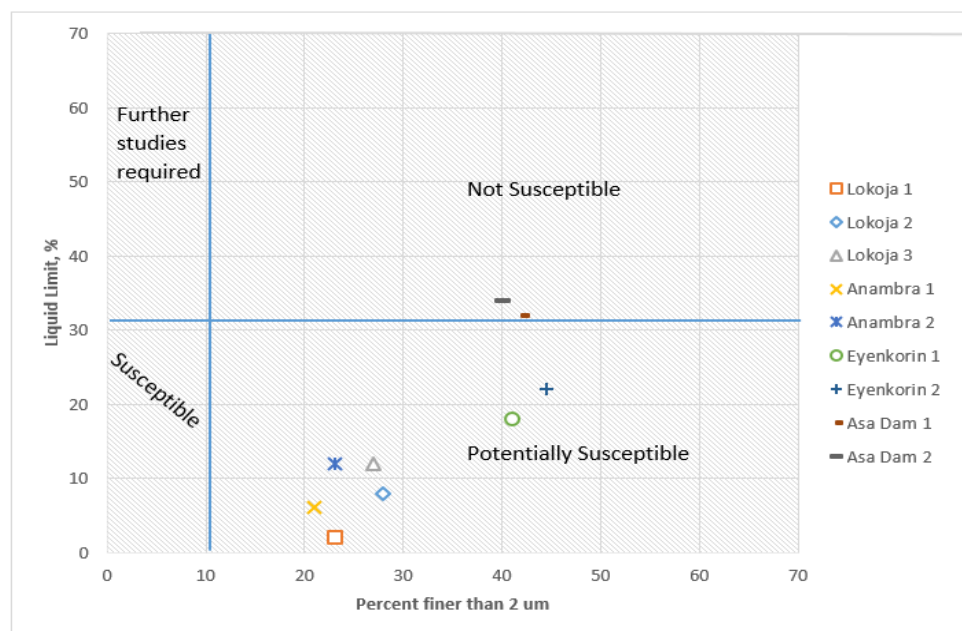

Figure 11: Liquefaction screening criteria after Andrews and Martin (2000).

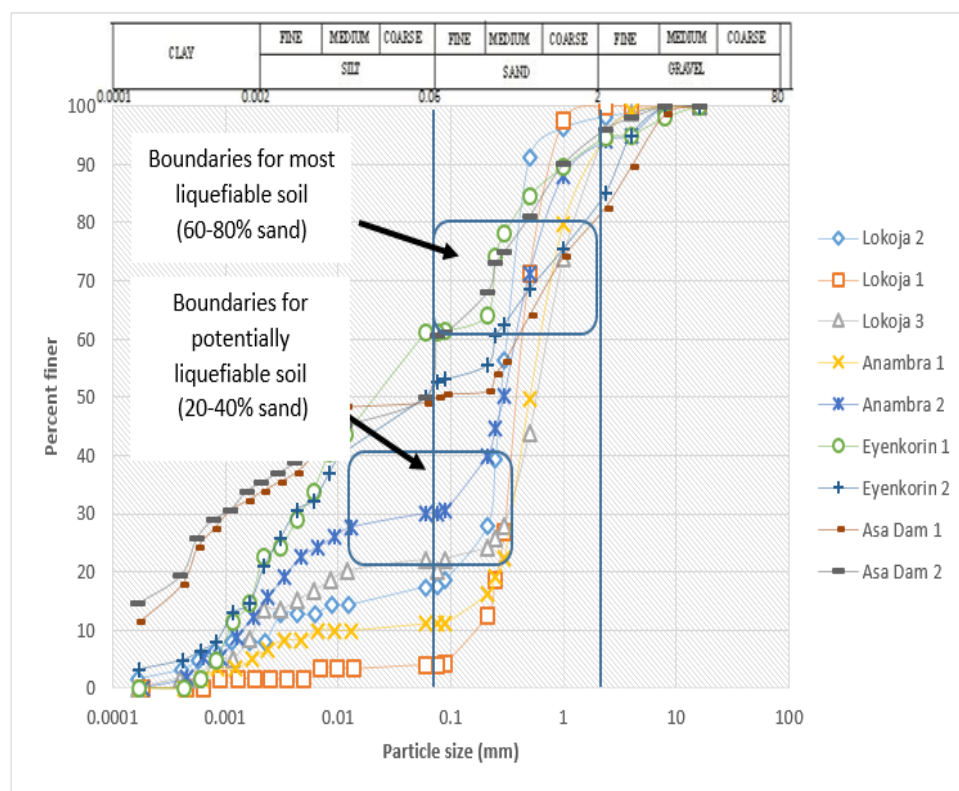

Figure 12: Boundaries in the gradation curves for soils susceptible to liquefaction (After Tsuchida, 1970).

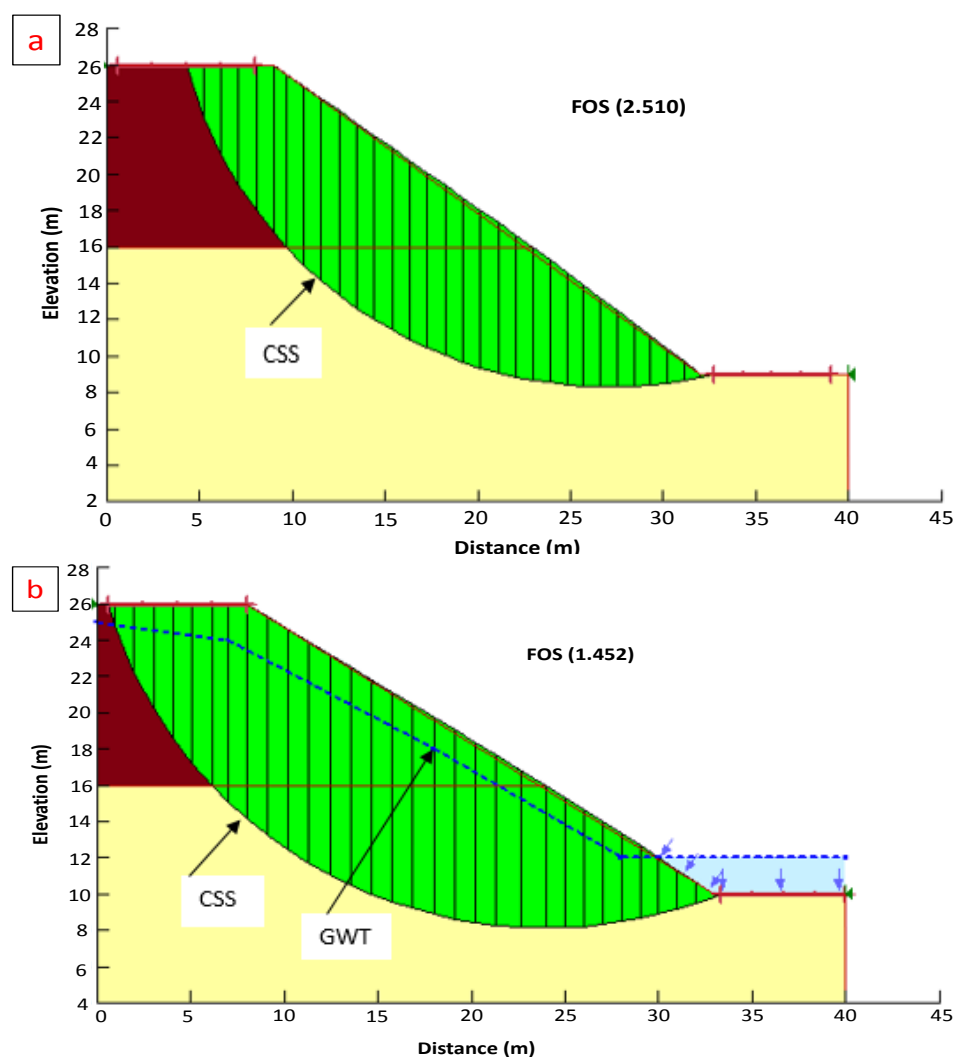

Figure 13: Non-optimised (a) dry and (b) wet slopes for Oko 1 and 2 (Anambra state).

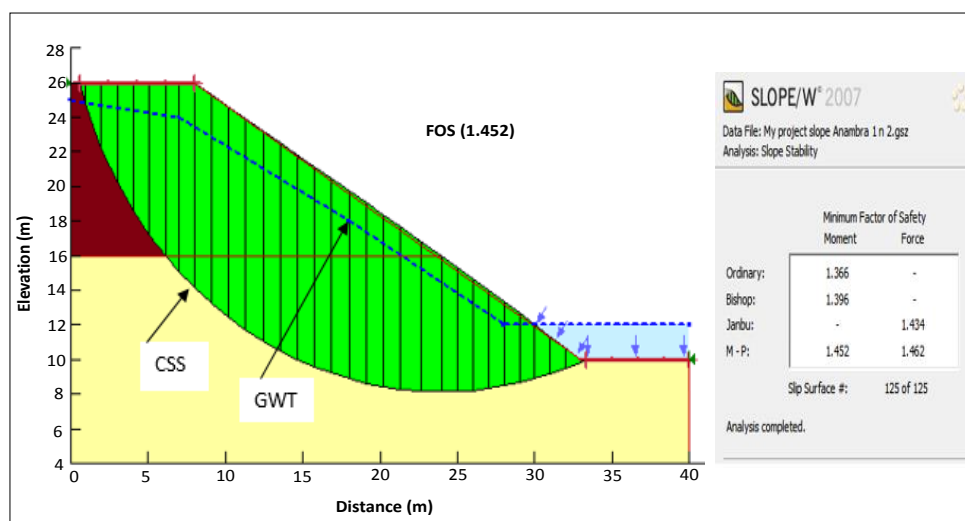

Figure 14: Non-optimised wet slope and factor of safety for Oko 1 and 2 (Anambra state).

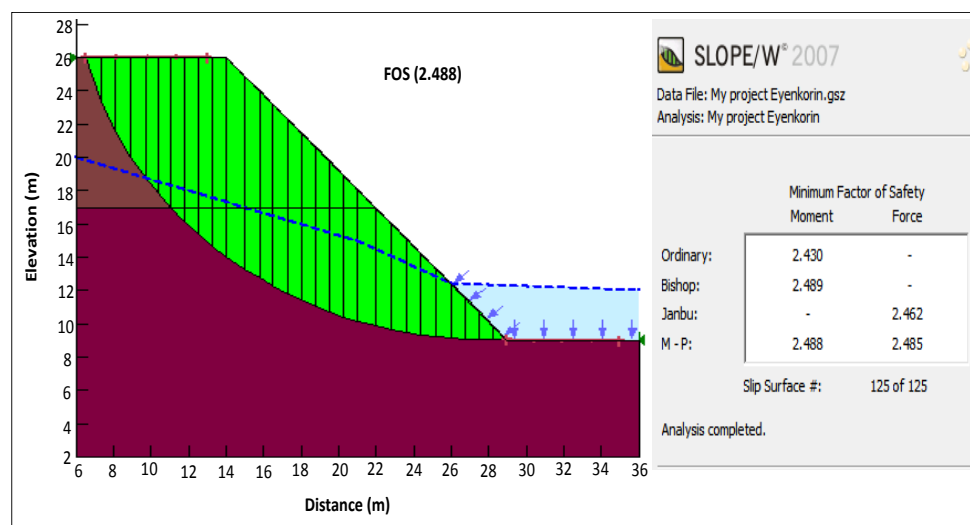

Figure 15: Non-optimised wet slope model and factor of safety for Eyenkorin 1 and 2 (Kwara).

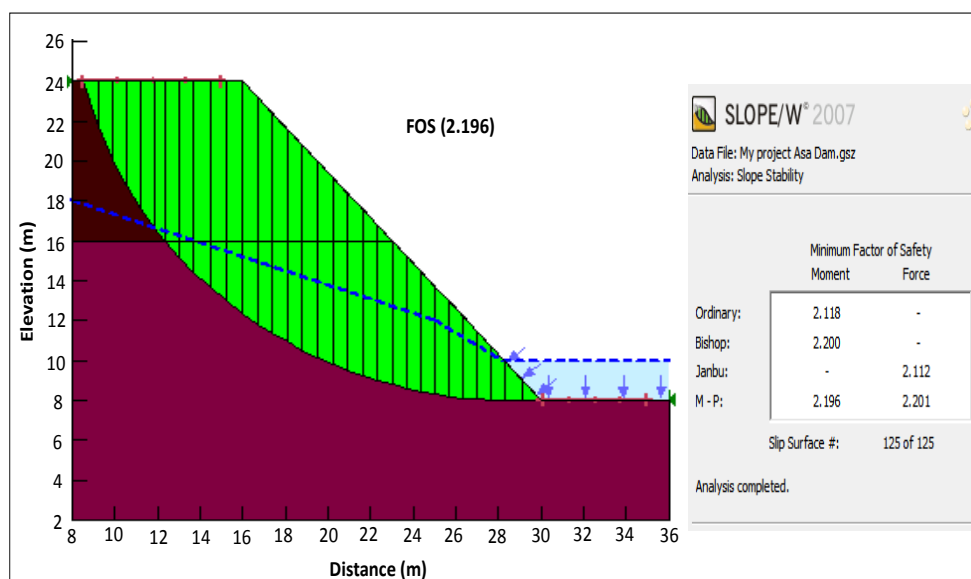

Figure 16: Non-optimised wet slope model and factor of safety for Asa Dam 1 and 2 (Kwara).



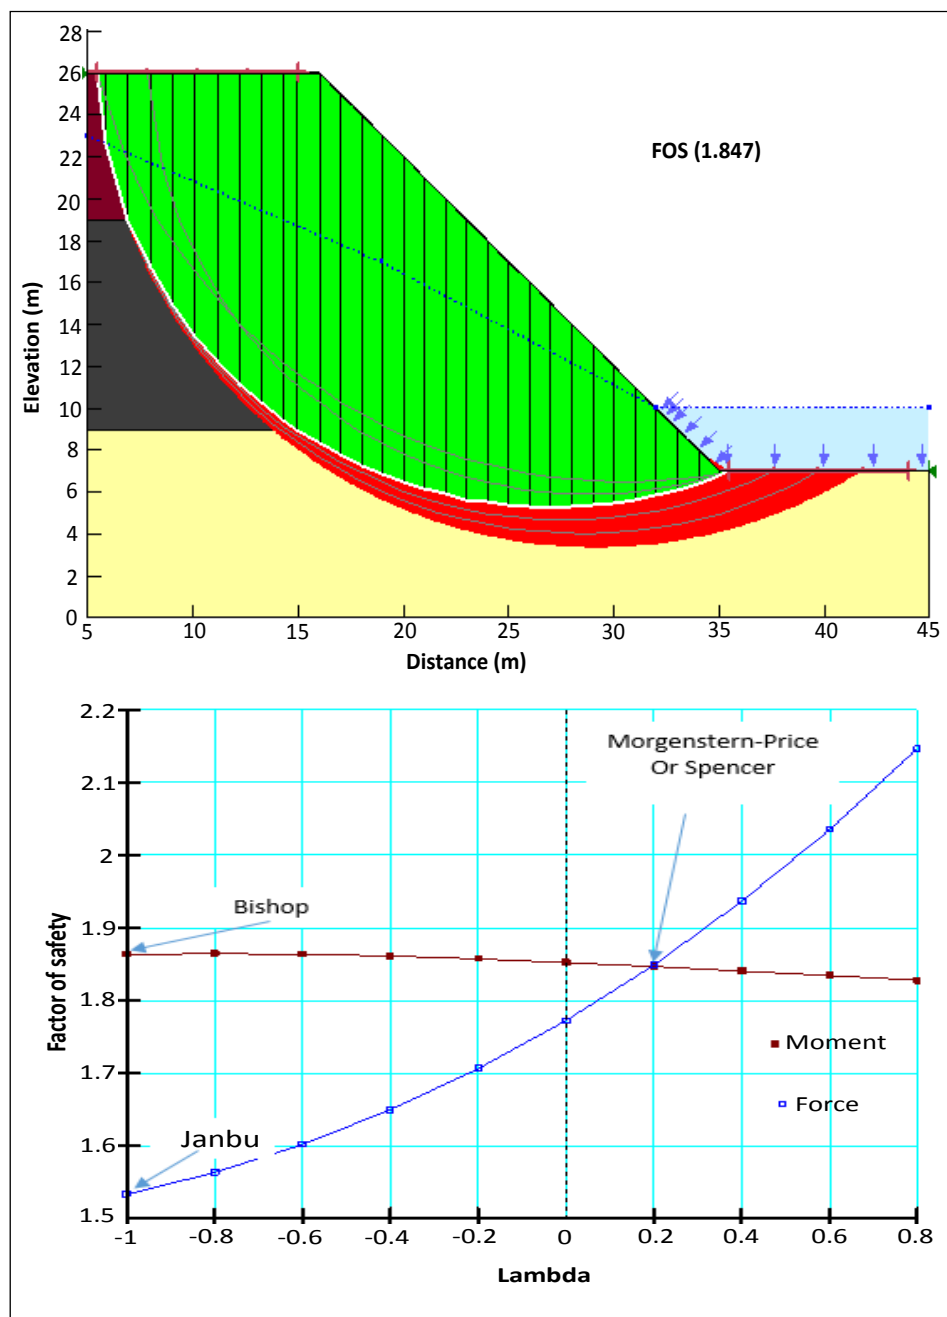

Figure 17: Critical slip surfaces and factor of safety from limit equilibrium analysis using SLOPE/W for 3 soil layers in Agbaja Hill, Lokoja (Kogi state), and plot of factor of safety versus lambda,  $\lambda$  (non-optimized).

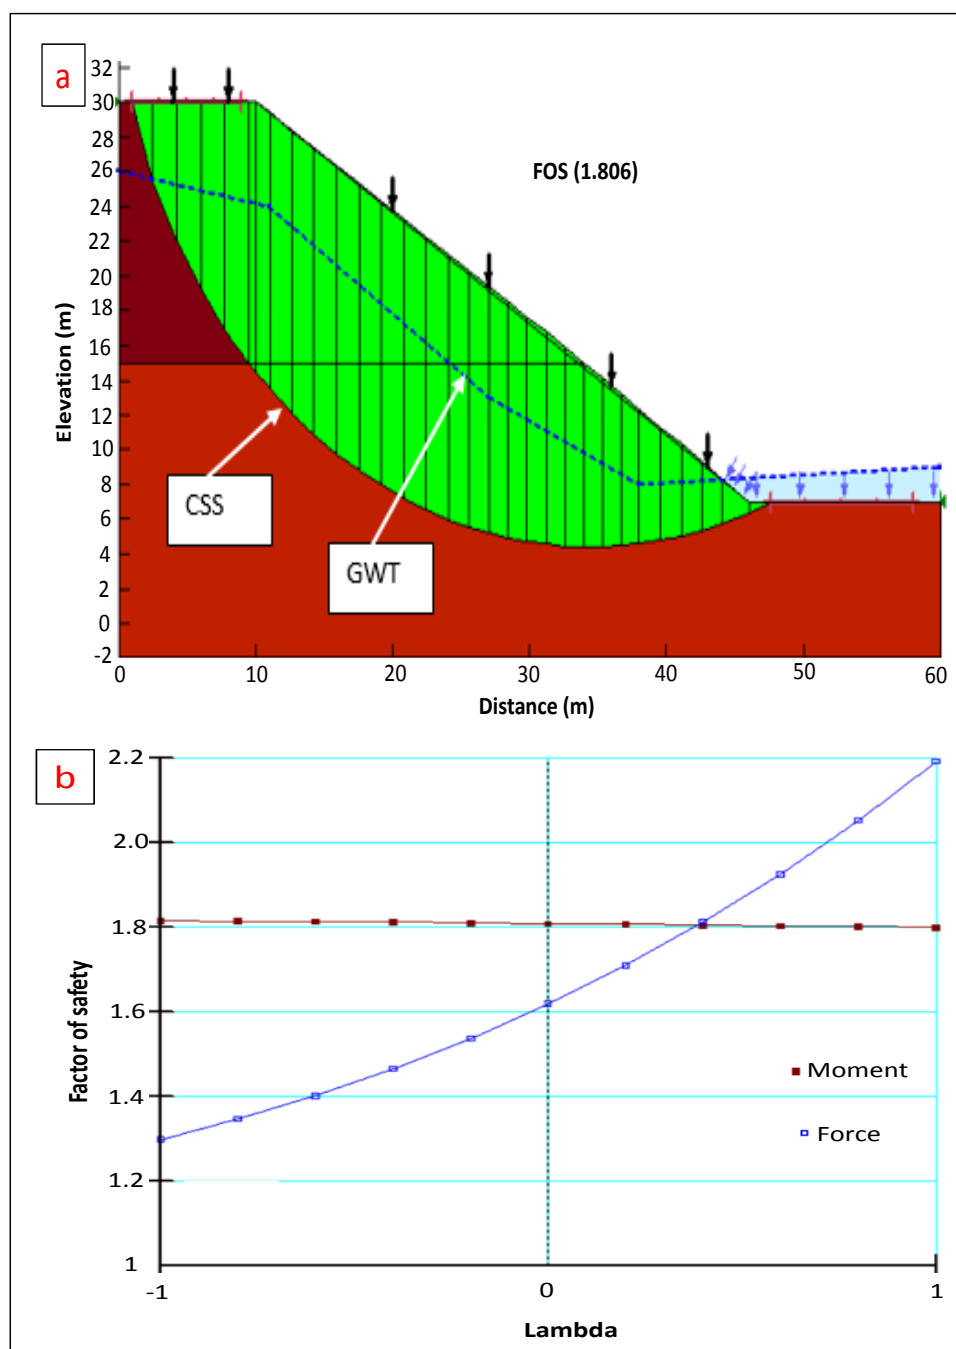

Figure 18: Showing (a) Optimised slope with point load of 40kPa, (b) Plot of FOS versus lambda,  $\lambda$  (optimised) with external loads of 40 kPa.

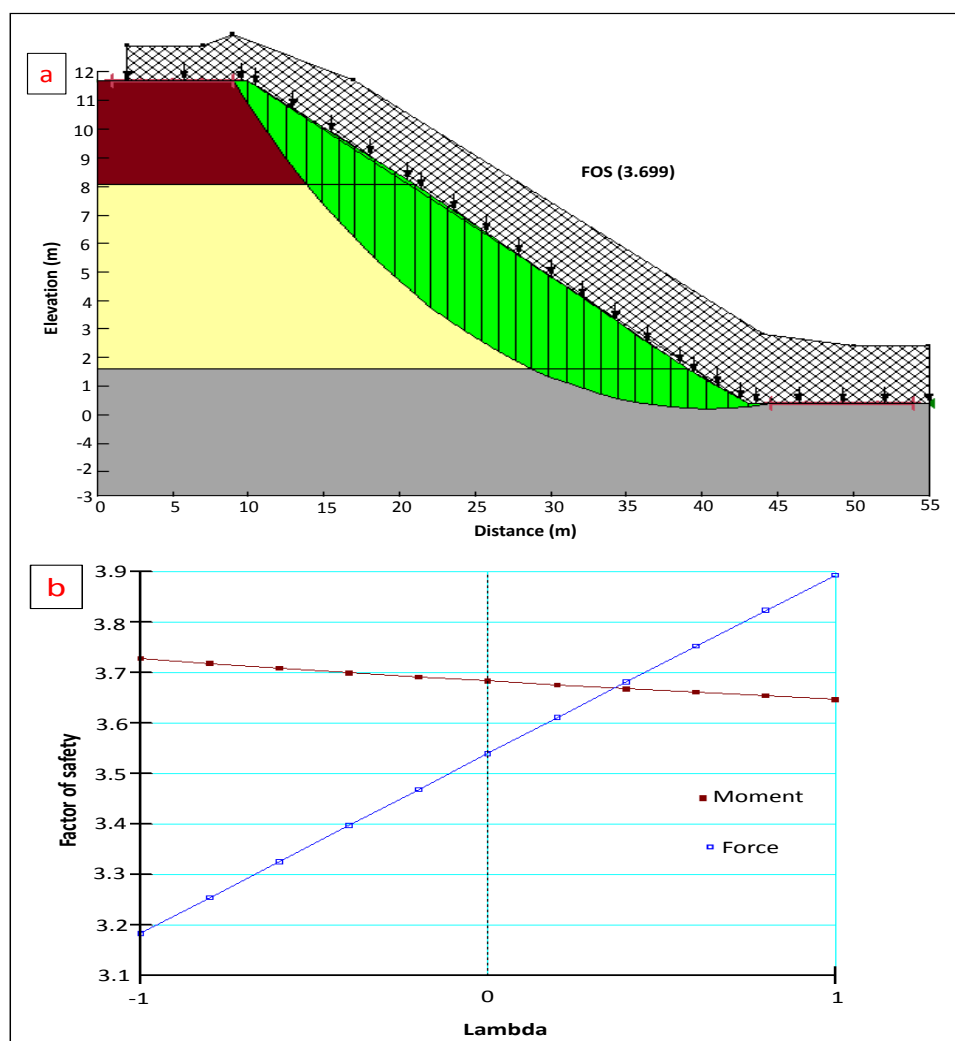

Figure 19: Showing (a) Optimised slope with reinforcement load of 50 kPa, (b) Plot of FOS versus lambda,  $\lambda$  (optimised) with reinforcement load of 50 kPa.
